# Supplementary material for: Comparative Analysis of Chloroplast Genomes for the Genus Manglietia Blume (Magnoliaceae): Molecular Structure and Phylogenetic Evolution
Source: MDPI journal article supplement (doi:10.3390/genes15040406), 2024-03-26
Supplement: s1 [file s1]

## Inverted Repeats

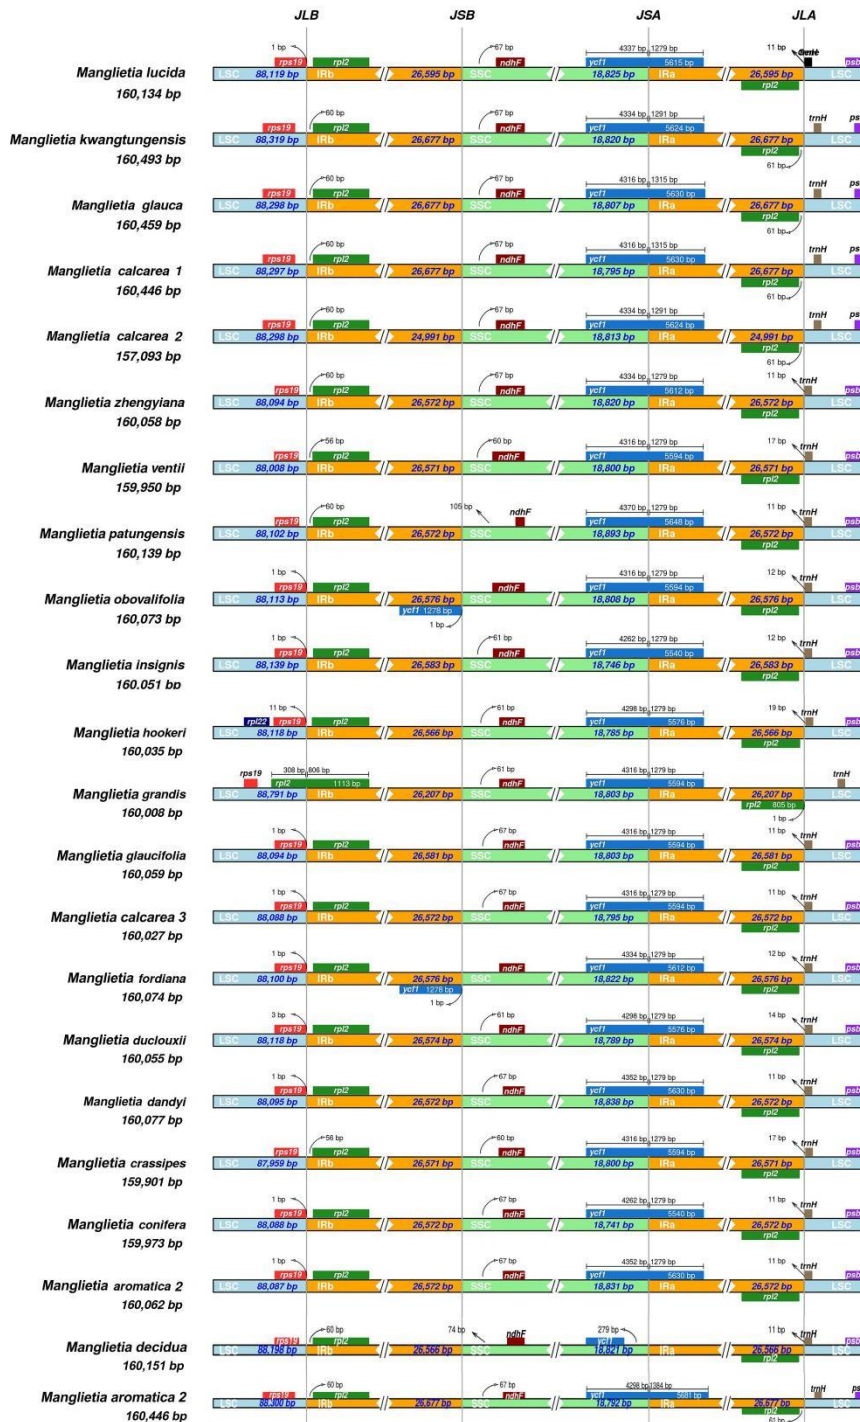

Figure S1. Comparison of the borders of LSC, SSC, and IR regions in twenty-two complete chloroplast genomes. JLB (IRb/LSC), JSB (IRb/SSC), JSA (SSC/IRa) and JLA (IRa/LSC) denote the junctions between each corresponding region in the genome.

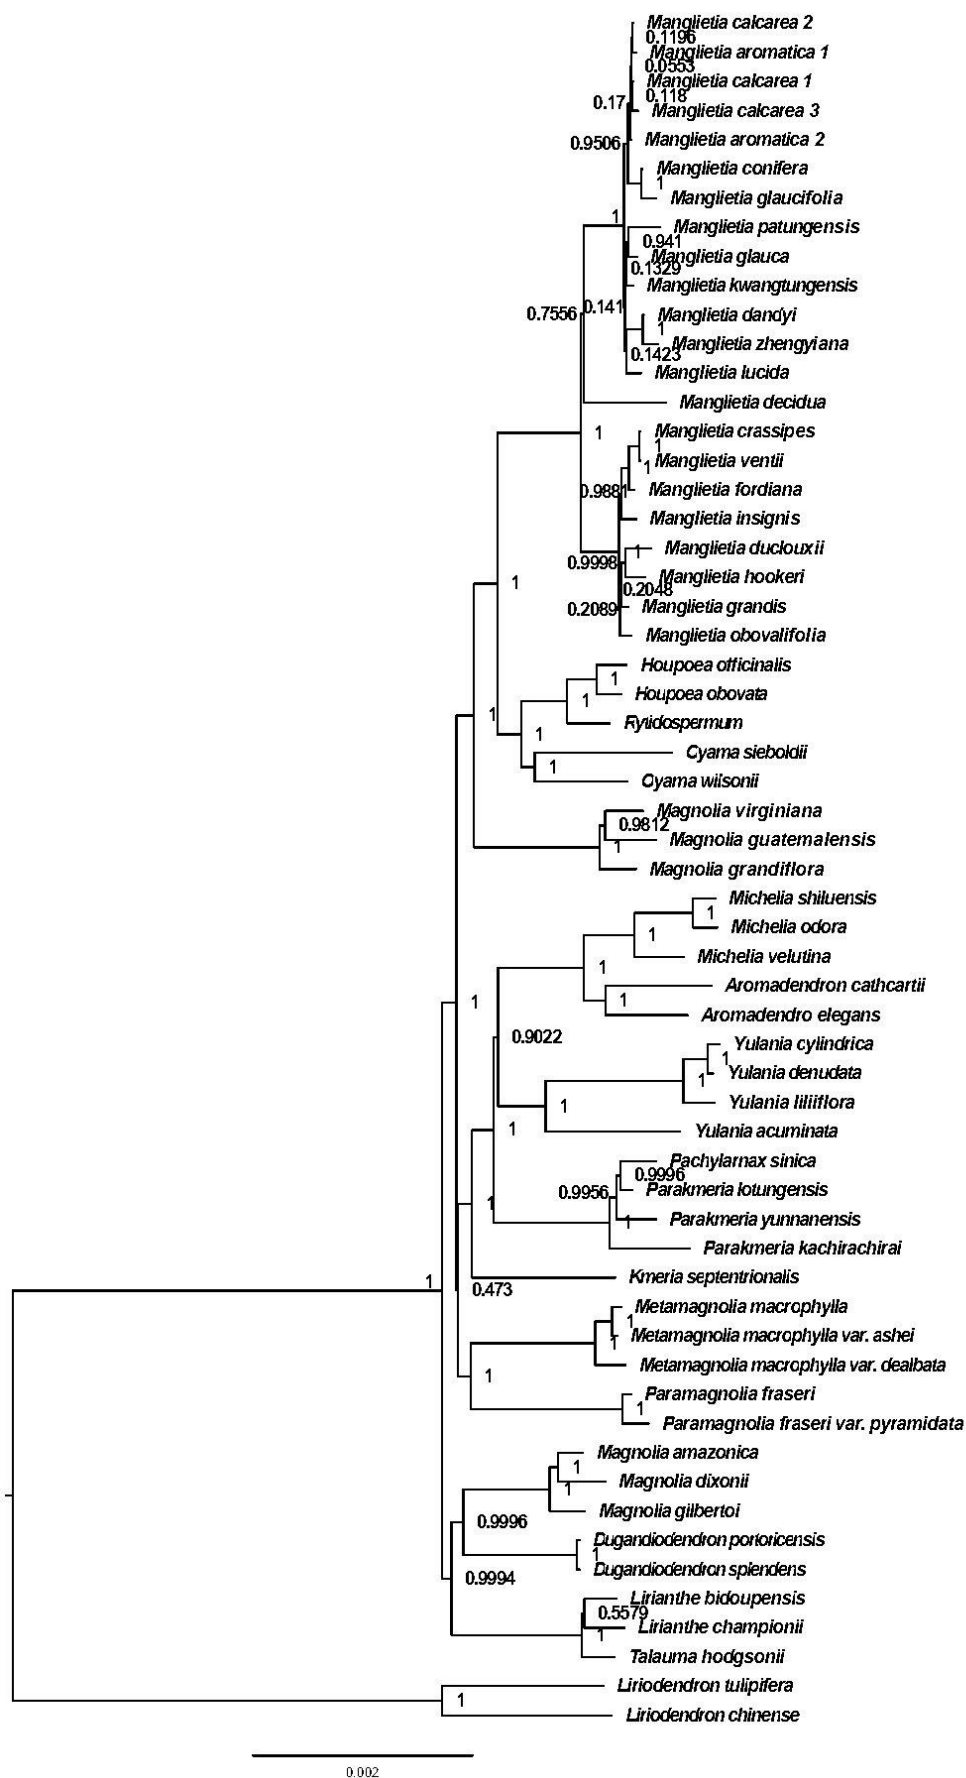

Figure S2. Bayesian inference based on a combined data matrix of 77 plastid genes for 59 species.
