# Supplementary material for: Comparative Analysis of Chloroplast Genomes for the Genus Manglietia Blume (Magnoliaceae): Molecular Structure and Phylogenetic Evolution
Source: Genes (Basel). 2024 Mar 26;15(4):406. doi: 10.3390/genes15040406 (PMC11048997; doi:10.3390/genes15040406)
Supplement: Supplementary file 1 [file genes-15-00406-s001.zip › genes-2915740-supplementary.xlsx]

## Sheet: Table S1
Table S1 Information of five samples of Manglietia newly squenced in this study
Species	Location	Collector	Voucher	Herbarium
Manglietia calcarea 1	GuiZhou	Yunfei Deng	DYF23042101	IBSC
Manglietia calcarea 2	GuiZhou	Yunfei Deng	DYF23042102	IBSC
Manglietia aromatica 1	Guangxi	Yusong Huang	MAYC5131	IBSC
Manglietia glauca	Guangdong	Tingzhang Li	LYL22071901	CANT
Manglietia kwangtungensis	Guangdong	Tingzhang Li	LYL22071902	CANT

## Sheet: Table S2
Table S2 Long repeat sequences in Manglietia plastomes.
Species	Size of Repeat Ⅰ	Repeat Ⅰ start	Match direction	Size of Repeat Ⅱ	Repeat Ⅱ start	Distance of Repeat	E-value
Manglietia insignis	31	9273	F	31	38104	-2	6.54e-06
Manglietia insignis	30	9274	P	30	47560	-1	5.62e-07
Manglietia insignis	33	17493	P	33	17493	-3	1.44e-05
Manglietia insignis	31	17495	P	31	17495	-3	0.00019
Manglietia insignis	33	31564	P	33	31564	-3	1.44e-05
Manglietia insignis	30	38105	P	30	47560	-3	0.000685
Manglietia insignis	41	41298	F	41	43522	-3	4.29e-10
Manglietia insignis	39	46249	F	39	102764	-2	1.59e-10
Manglietia insignis	39	46249	P	39	145387	-2	1.59e-10
Manglietia insignis	30	46261	F	30	102776	-3	0.000685
Manglietia insignis	30	46261	P	30	145384	-3	0.000685
Manglietia insignis	32	67837	P	32	67881	-1	3.75e-08
Manglietia insignis	42	92890	F	42	92911	-1	4.69e-14
Manglietia insignis	42	92890	P	42	155237	-1	4.69e-14
Manglietia insignis	42	92911	P	42	155258	-1	4.69e-14
Manglietia insignis	33	95324	F	33	95348	0	9.76e-11
Manglietia insignis	33	95324	P	33	152809	0	9.76e-11
Manglietia insignis	33	95348	P	33	152833	0	9.76e-11
Manglietia insignis	30	113286	F	30	113327	-2	2.45e-05
Manglietia insignis	30	113286	P	30	134833	-2	2.45e-05
Manglietia insignis	30	113327	P	30	134874	-2	2.45e-05
Manglietia insignis	37	128957	P	37	128957	-3	8e-08
Manglietia insignis	42	130344	P	42	130344	-2	2.89e-12
Manglietia insignis	30	134834	F	30	134875	-2	2.45e-05
Manglietia insignis	33	152809	F	33	152833	0	9.76e-11
Manglietia insignis	42	155237	F	42	155258	-1	4.69e-14
Manglietia insignis	31	155248	F	31	155269	0	1.56e-09
Manglietia lucida	31	9277	F	31	38110	-2	6.54e-06
Manglietia lucida	30	9278	P	30	47561	-1	5.63e-07
Manglietia lucida	33	31546	P	33	31546	-3	1.44e-05
Manglietia lucida	30	38111	P	30	47561	-3	0.000686
Manglietia lucida	41	41294	F	41	43518	-3	4.29e-10
Manglietia lucida	39	46246	F	39	102743	-2	1.59e-10
Manglietia lucida	39	46246	P	39	145471	-2	1.59e-10
Manglietia lucida	30	46258	F	30	102755	-3	0.000686
Manglietia lucida	30	46258	P	30	145468	-3	0.000686
Manglietia lucida	32	67801	P	32	67845	-1	3.75e-08
Manglietia lucida	42	92869	F	42	92890	-1	4.7e-14
Manglietia lucida	42	92869	P	42	155321	-1	4.7e-14
Manglietia lucida	42	92890	P	42	155342	-1	4.7e-14
Manglietia lucida	33	95303	F	33	95327	0	9.77e-11
Manglietia lucida	33	95303	P	33	152893	0	9.77e-11
Manglietia lucida	33	95327	P	33	152917	0	9.77e-11
Manglietia lucida	30	113278	F	30	113319	-2	2.45e-05
Manglietia lucida	30	113278	P	30	134904	-2	2.45e-05
Manglietia lucida	30	113319	P	30	134945	-2	2.45e-05
Manglietia lucida	45	118468	P	45	118468	-3	2.23e-12
Manglietia lucida	37	128960	P	37	128960	-3	8.01e-08
Manglietia lucida	42	130340	P	42	130340	-2	2.89e-12
Manglietia lucida	75	132795	F	75	132813	0	5.05e-36
Manglietia lucida	57	132795	F	57	132831	0	3.47e-25
Manglietia lucida	39	132795	F	39	132849	0	2.39e-14
Manglietia lucida	30	134905	F	30	134946	-2	2.45e-05
Manglietia lucida	33	152893	F	33	152917	0	9.77e-11
Manglietia lucida	42	155321	F	42	155342	-1	4.7e-14
Manglietia lucida	31	155332	F	31	155353	0	1.56e-09
Manglietia obovalifolia	31	9267	F	31	38087	-2	6.54e-06
Manglietia obovalifolia	30	9268	P	30	47544	-1	5.63e-07
Manglietia obovalifolia	33	17486	P	33	17486	-3	1.44e-05
Manglietia obovalifolia	31	17488	P	31	17488	-3	0.00019
Manglietia obovalifolia	33	31546	P	33	31546	-3	1.44e-05
Manglietia obovalifolia	30	38088	P	30	47544	-3	0.000685
Manglietia obovalifolia	41	41281	F	41	43505	-3	4.29e-10
Manglietia obovalifolia	39	46233	F	39	102738	-2	1.59e-10
Manglietia obovalifolia	39	46233	P	39	145409	-2	1.59e-10
Manglietia obovalifolia	30	46245	F	30	102750	-3	0.000685
Manglietia obovalifolia	30	46245	P	30	145406	-3	0.000685
Manglietia obovalifolia	32	67817	P	32	67861	-1	3.75e-08
Manglietia obovalifolia	42	92864	F	42	92885	-1	4.69e-14
Manglietia obovalifolia	42	92864	P	42	155259	-1	4.69e-14
Manglietia obovalifolia	42	92885	P	42	155280	-1	4.69e-14
Manglietia obovalifolia	33	95298	F	33	95322	0	9.77e-11
Manglietia obovalifolia	33	95298	P	33	152831	0	9.77e-11
Manglietia obovalifolia	33	95322	P	33	152855	0	9.77e-11
Manglietia obovalifolia	30	113253	F	30	113294	-2	2.45e-05
Manglietia obovalifolia	30	113253	P	30	134862	-2	2.45e-05
Manglietia obovalifolia	30	113294	P	30	134903	-2	2.45e-05
Manglietia obovalifolia	37	128939	P	37	128939	-3	8e-08
Manglietia obovalifolia	42	130319	P	42	130319	-2	2.89e-12
Manglietia obovalifolia	75	132753	F	75	132771	0	5.05e-36
Manglietia obovalifolia	57	132753	F	57	132789	0	3.47e-25
Manglietia obovalifolia	39	132753	F	39	132807	0	2.38e-14
Manglietia obovalifolia	30	134863	F	30	134904	-2	2.45e-05
Manglietia obovalifolia	33	152831	F	33	152855	0	9.77e-11
Manglietia obovalifolia	42	155259	F	42	155280	-1	4.69e-14
Manglietia obovalifolia	31	155270	F	31	155291	0	1.56e-09
Manglietia patungensis	31	9270	F	31	38094	-2	6.55e-06
Manglietia patungensis	30	9271	P	30	47554	-1	5.63e-07
Manglietia patungensis	33	31530	P	33	31530	-3	1.44e-05
Manglietia patungensis	30	38095	P	30	47554	-3	0.000686
Manglietia patungensis	41	41287	F	41	43511	-3	4.29e-10
Manglietia patungensis	39	46239	F	39	102726	-2	1.59e-10
Manglietia patungensis	39	46239	P	39	145476	-2	1.59e-10
Manglietia patungensis	30	46251	F	30	102738	-3	0.000686
Manglietia patungensis	30	46251	P	30	145473	-3	0.000686
Manglietia patungensis	30	67794	P	30	67840	-1	5.63e-07
Manglietia patungensis	42	92852	F	42	92873	-1	4.7e-14
Manglietia patungensis	42	92852	P	42	155326	-1	4.7e-14
Manglietia patungensis	42	92873	P	42	155347	-1	4.7e-14
Manglietia patungensis	33	95286	F	33	95310	0	9.77e-11
Manglietia patungensis	33	95286	P	33	152898	0	9.77e-11
Manglietia patungensis	33	95310	P	33	152922	0	9.77e-11
Manglietia patungensis	30	113238	F	30	113279	-2	2.45e-05
Manglietia patungensis	30	113238	P	30	134932	-2	2.45e-05
Manglietia patungensis	30	113279	P	30	134973	-2	2.45e-05
Manglietia patungensis	48	114709	F	48	114747	-1	1.31e-17
Manglietia patungensis	37	128955	P	37	128955	-3	8.01e-08
Manglietia patungensis	42	130335	P	42	130335	-2	2.89e-12
Manglietia patungensis	129	132769	F	129	132787	0	1.56e-68
Manglietia patungensis	111	132769	F	111	132805	0	1.07e-57
Manglietia patungensis	93	132769	F	93	132823	0	7.35e-47
Manglietia patungensis	75	132769	F	75	132841	0	5.05e-36
Manglietia patungensis	57	132769	F	57	132859	0	3.47e-25
Manglietia patungensis	39	132769	F	39	132877	0	2.39e-14
Manglietia patungensis	30	134933	F	30	134974	-2	2.45e-05
Manglietia patungensis	33	152898	F	33	152922	0	9.77e-11
Manglietia patungensis	42	155326	F	42	155347	-1	4.7e-14
Manglietia patungensis	31	155337	F	31	155358	0	1.56e-09
Manglietia ventii	31	9275	F	31	38099	-2	6.53e-06
Manglietia ventii	30	9276	P	30	47555	-1	5.62e-07
Manglietia ventii	31	17496	P	31	17496	-1	1.45e-07
Manglietia ventii	33	31553	P	33	31553	-3	1.44e-05
Manglietia ventii	30	38100	P	30	47555	-3	0.000684
Manglietia ventii	41	41293	F	41	43517	-3	4.28e-10
Manglietia ventii	39	46244	F	39	102628	-2	1.59e-10
Manglietia ventii	39	46244	P	39	145291	-2	1.59e-10
Manglietia ventii	30	46256	F	30	102640	-3	0.000684
Manglietia ventii	30	46256	P	30	145288	-3	0.000684
Manglietia ventii	32	67720	P	32	67764	-1	3.74e-08
Manglietia ventii	42	92754	F	42	92775	-1	4.69e-14
Manglietia ventii	42	92754	P	42	155141	-1	4.69e-14
Manglietia ventii	42	92775	P	42	155162	-1	4.69e-14
Manglietia ventii	33	95188	F	33	95212	0	9.75e-11
Manglietia ventii	33	95188	P	33	152713	0	9.75e-11
Manglietia ventii	33	95212	P	33	152737	0	9.75e-11
Manglietia ventii	30	113143	F	30	113184	-2	2.44e-05
Manglietia ventii	30	113143	P	30	134744	-2	2.44e-05
Manglietia ventii	30	113184	P	30	134785	-2	2.44e-05
Manglietia ventii	37	128821	P	37	128821	-3	7.99e-08
Manglietia ventii	42	130201	P	42	130201	-2	2.88e-12
Manglietia ventii	75	132635	F	75	132653	0	5.04e-36
Manglietia ventii	57	132635	F	57	132671	0	3.46e-25
Manglietia ventii	39	132635	F	39	132689	0	2.38e-14
Manglietia ventii	30	134745	F	30	134786	-2	2.44e-05
Manglietia ventii	33	152713	F	33	152737	0	9.75e-11
Manglietia ventii	42	155141	F	42	155162	-1	4.69e-14
Manglietia ventii	31	155152	F	31	155173	0	1.56e-09
Manglietia zhengyiana	31	9270	F	31	38095	-2	6.54e-06
Manglietia zhengyiana	30	9271	P	30	47555	-1	5.62e-07
Manglietia zhengyiana	33	31532	P	33	31532	-3	1.44e-05
Manglietia zhengyiana	30	38096	P	30	47555	-3	0.000685
Manglietia zhengyiana	41	41288	F	41	43512	-3	4.29e-10
Manglietia zhengyiana	39	46240	F	39	102718	-2	1.59e-10
Manglietia zhengyiana	39	46240	P	39	145395	-2	1.59e-10
Manglietia zhengyiana	30	46252	F	30	102730	-3	0.000685
Manglietia zhengyiana	30	46252	P	30	145392	-3	0.000685
Manglietia zhengyiana	32	67787	P	32	67831	-1	3.75e-08
Manglietia zhengyiana	42	92844	F	42	92865	-1	4.69e-14
Manglietia zhengyiana	42	92844	P	42	155245	-1	4.69e-14
Manglietia zhengyiana	42	92865	P	42	155266	-1	4.69e-14
Manglietia zhengyiana	33	95278	F	33	95302	0	9.76e-11
Manglietia zhengyiana	33	95278	P	33	152817	0	9.76e-11
Manglietia zhengyiana	33	95302	P	33	152841	0	9.76e-11
Manglietia zhengyiana	30	113230	F	30	113271	-2	2.45e-05
Manglietia zhengyiana	30	113230	P	30	134851	-2	2.45e-05
Manglietia zhengyiana	30	113271	P	30	134892	-2	2.45e-05
Manglietia zhengyiana	37	128910	P	37	128910	-3	8e-08
Manglietia zhengyiana	93	132724	F	93	132742	0	7.35e-47
Manglietia zhengyiana	75	132724	F	75	132760	0	5.05e-36
Manglietia zhengyiana	57	132724	F	57	132778	0	3.47e-25
Manglietia zhengyiana	39	132724	F	39	132796	0	2.38e-14
Manglietia zhengyiana	30	134852	F	30	134893	-2	2.45e-05
Manglietia zhengyiana	33	152817	F	33	152841	0	9.76e-11
Manglietia zhengyiana	42	155245	F	42	155266	-1	4.69e-14
Manglietia zhengyiana	31	155256	F	31	155277	0	1.56e-09
Manglietia calcarea 2	31	9366	F	31	38191	-2	6.3e-06
Manglietia calcarea 2	30	9367	P	30	47650	-1	5.42e-07
Manglietia calcarea 2	33	31629	P	33	31629	-3	1.39e-05
Manglietia calcarea 2	30	38192	P	30	47650	-3	0.00066
Manglietia calcarea 2	41	41384	F	41	43608	-3	4.13e-10
Manglietia calcarea 2	39	46336	F	39	102922	-2	1.53e-10
Manglietia calcarea 2	39	46336	P	39	142430	-2	1.53e-10
Manglietia calcarea 2	30	46348	F	30	102934	-3	0.00066
Manglietia calcarea 2	30	46348	P	30	142427	-3	0.00066
Manglietia calcarea 2	30	46348	F	30	102934	-3	0.00066
Manglietia calcarea 2	30	46348	P	30	142427	-3	0.00066
Manglietia calcarea 2	32	67893	P	32	67937	-1	3.61e-08
Manglietia calcarea 2	105	88193	F	105	88298	0	4.22e-54
Manglietia calcarea 2	105	88193	P	105	156988	0	4.22e-54
Manglietia calcarea 2	42	93048	F	42	93069	-1	4.52e-14
Manglietia calcarea 2	42	93048	P	42	152280	-1	4.52e-14
Manglietia calcarea 2	42	93069	P	42	152301	-1	4.52e-14
Manglietia calcarea 2	33	95482	F	33	95506	0	9.41e-11
Manglietia calcarea 2	33	95482	P	33	149852	0	9.41e-11
Manglietia calcarea 2	33	95506	P	33	149876	0	9.41e-11
Manglietia calcarea 2	30	111748	F	30	111789	-2	2.36e-05
Manglietia calcarea 2	30	111748	P	30	133572	-2	2.36e-05
Manglietia calcarea 2	30	111789	P	30	133613	-2	2.36e-05
Manglietia calcarea 2	106	113079	P	106	132101	0	1.05e-54
Manglietia calcarea 2	105	113079	F	105	113184	0	4.22e-54
Manglietia calcarea 2	105	113184	P	105	132207	0	4.22e-54
Manglietia calcarea 2	37	127526	P	37	127526	-3	7.71e-08
Manglietia calcarea 2	42	128906	P	42	128906	-2	2.78e-12
Manglietia calcarea 2	93	131340	F	93	131358	0	7.08e-47
Manglietia calcarea 2	75	131340	F	75	131376	0	4.86e-36
Manglietia calcarea 2	57	131340	F	57	131394	0	3.34e-25
Manglietia calcarea 2	39	131340	F	39	131412	0	2.3e-14
Manglietia calcarea 2	106	132101	F	106	132206	0	1.05e-54
Manglietia calcarea 2	30	133573	F	30	133614	-2	2.36e-05
Manglietia calcarea 2	33	149852	F	33	149876	0	9.41e-11
Manglietia calcarea 2	42	152280	F	42	152301	-1	4.52e-14
Manglietia calcarea 2	31	152291	F	31	152312	0	1.51e-09
Manglietia calcarea 1	31	9366	F	31	38191	-2	6.57e-06
Manglietia calcarea 1	30	9367	P	30	47651	-1	5.65e-07
Manglietia calcarea 1	33	31629	P	33	31629	-3	1.45e-05
Manglietia calcarea 1	30	38192	P	30	47651	-3	0.000688
Manglietia calcarea 1	30	38192	P	30	47651	-3	0.000688
Manglietia calcarea 1	41	41384	F	41	43608	-3	4.31e-10
Manglietia calcarea 1	39	46337	F	39	102921	-2	1.6e-10
Manglietia calcarea 1	39	46337	P	39	145783	-2	1.6e-10
Manglietia calcarea 1	30	46349	F	30	102933	-3	0.000688
Manglietia calcarea 1	30	46349	P	30	145780	-3	0.000688
Manglietia calcarea 1	30	46349	F	30	102933	-3	0.000688
Manglietia calcarea 1	30	46349	P	30	145780	-3	0.000688
Manglietia calcarea 1	32	67893	P	32	67937	-1	3.77e-08
Manglietia calcarea 1	105	88192	F	105	88297	0	4.4e-54
Manglietia calcarea 1	105	88192	P	105	160341	0	4.4e-54
Manglietia calcarea 1	42	93047	F	42	93068	-1	4.72e-14
Manglietia calcarea 1	42	93047	P	42	155633	-1	4.72e-14
Manglietia calcarea 1	42	93068	P	42	155654	-1	4.72e-14
Manglietia calcarea 1	33	95481	F	33	95505	0	9.81e-11
Manglietia calcarea 1	33	95481	P	33	153205	0	9.81e-11
Manglietia calcarea 1	33	95505	P	33	153229	0	9.81e-11
Manglietia calcarea 1	30	113433	F	30	113474	-2	2.46e-05
Manglietia calcarea 1	30	113433	P	30	135239	-2	2.46e-05
Manglietia calcarea 1	30	113474	P	30	135280	-2	2.46e-05
Manglietia calcarea 1	106	114764	P	106	133768	0	1.1e-54
Manglietia calcarea 1	105	114764	F	105	114869	0	4.4e-54
Manglietia calcarea 1	105	114869	P	105	133874	0	4.4e-54
Manglietia calcarea 1	37	129211	P	37	129211	-3	8.04e-08
Manglietia calcarea 1	42	130591	P	42	130591	-2	2.9e-12
Manglietia calcarea 1	75	133025	F	75	133043	0	5.07e-36
Manglietia calcarea 1	57	133025	F	57	133061	0	3.49e-25
Manglietia calcarea 1	39	133025	F	39	133079	0	2.4e-14
Manglietia calcarea 1	106	133768	F	106	133873	0	1.1e-54
Manglietia calcarea 1	30	135240	F	30	135281	-2	2.46e-05
Manglietia calcarea 1	33	153205	F	33	153229	0	9.81e-11
Manglietia calcarea 1	42	155633	F	42	155654	-1	4.72e-14
Manglietia calcarea 1	31	155644	F	31	155665	0	1.57e-09
Manglietia glauca	31	9380	F	31	38191	-2	6.57e-06
Manglietia glauca	30	9381	P	30	47649	-1	5.65e-07
Manglietia glauca	33	31632	P	33	31632	-3	1.45e-05
Manglietia glauca	30	38192	P	30	47649	-3	0.000689
Manglietia glauca	30	38192	P	30	47649	-3	0.000689
Manglietia glauca	41	41384	F	41	43608	-3	4.31e-10
Manglietia glauca	39	46335	F	39	102922	-2	1.6e-10
Manglietia glauca	39	46335	P	39	145796	-2	1.6e-10
Manglietia glauca	30	46347	F	30	102934	-3	0.000689
Manglietia glauca	30	46347	P	30	145793	-3	0.000689
Manglietia glauca	30	46347	F	30	102934	-3	0.000689
Manglietia glauca	30	46347	P	30	145793	-3	0.000689
Manglietia glauca	32	67887	P	32	67931	-1	3.77e-08
Manglietia glauca	105	88193	F	105	88298	0	4.4e-54
Manglietia glauca	105	88193	P	105	160354	0	4.4e-54
Manglietia glauca	42	93048	F	42	93069	-1	4.72e-14
Manglietia glauca	42	93048	P	42	155646	-1	4.72e-14
Manglietia glauca	42	93069	P	42	155667	-1	4.72e-14
Manglietia glauca	33	95482	F	33	95506	0	9.81e-11
Manglietia glauca	33	95482	P	33	153218	0	9.81e-11
Manglietia glauca	33	95506	P	33	153242	0	9.81e-11
Manglietia glauca	30	113434	F	30	113475	-2	2.46e-05
Manglietia glauca	30	113434	P	30	135252	-2	2.46e-05
Manglietia glauca	30	113475	P	30	135293	-2	2.46e-05
Manglietia glauca	106	114765	P	106	133781	0	1.1e-54
Manglietia glauca	105	114765	F	105	114870	0	4.4e-54
Manglietia glauca	105	114870	P	105	133887	0	4.4e-54
Manglietia glauca	37	129224	P	37	129224	-3	8.04e-08
Manglietia glauca	42	130604	P	42	130604	-2	2.9e-12
Manglietia glauca	75	133038	F	75	133056	0	5.07e-36
Manglietia glauca	57	133038	F	57	133074	0	3.49e-25
Manglietia glauca	39	133038	F	39	133092	0	2.4e-14
Manglietia glauca	106	133781	F	106	133886	0	1.1e-54
Manglietia glauca	30	135253	F	30	135294	-2	2.46e-05
Manglietia glauca	33	153218	F	33	153242	0	9.81e-11
Manglietia glauca	42	155646	F	42	155667	-1	4.72e-14
Manglietia glauca	31	155657	F	31	155678	0	1.57e-09
Manglietia kwangtungensis	31	9378	F	31	38205	-2	6.57e-06
Manglietia kwangtungensis	30	9379	P	30	47663	-1	5.66e-07
Manglietia kwangtungensis	33	31641	P	33	31641	-3	1.45e-05
Manglietia kwangtungensis	30	38206	P	30	47663	-3	0.000689
Manglietia kwangtungensis	30	38206	P	30	47663	-3	0.000689
Manglietia kwangtungensis	41	41398	F	41	43622	-3	4.31e-10
Manglietia kwangtungensis	39	46350	F	39	102943	-2	1.6e-10
Manglietia kwangtungensis	39	46350	P	39	145830	-2	1.6e-10
Manglietia kwangtungensis	30	46362	F	30	102955	-3	0.000689
Manglietia kwangtungensis	30	46362	P	30	145827	-3	0.000689
Manglietia kwangtungensis	30	46362	F	30	102955	-3	0.000689
Manglietia kwangtungensis	30	46362	P	30	145827	-3	0.000689
Manglietia kwangtungensis	32	67909	P	32	67953	-1	3.77e-08
Manglietia kwangtungensis	105	88214	F	105	88319	0	4.4e-54
Manglietia kwangtungensis	105	88214	P	105	160388	0	4.4e-54
Manglietia kwangtungensis	42	93069	F	42	93090	-1	4.72e-14
Manglietia kwangtungensis	42	93069	P	42	155680	-1	4.72e-14
Manglietia kwangtungensis	42	93090	P	42	155701	-1	4.72e-14
Manglietia kwangtungensis	33	95503	F	33	95527	0	9.82e-11
Manglietia kwangtungensis	33	95503	P	33	153252	0	9.82e-11
Manglietia kwangtungensis	33	95527	P	33	153276	0	9.82e-11
Manglietia kwangtungensis	30	113455	F	30	113496	-2	2.46e-05
Manglietia kwangtungensis	30	113455	P	30	135286	-2	2.46e-05
Manglietia kwangtungensis	30	113496	P	30	135327	-2	2.46e-05
Manglietia kwangtungensis	106	114786	P	106	133815	0	1.1e-54
Manglietia kwangtungensis	105	114786	F	105	114891	0	4.4e-54
Manglietia kwangtungensis	105	114891	P	105	133921	0	4.4e-54
Manglietia kwangtungensis	37	129240	P	37	129240	-3	8.05e-08
Manglietia kwangtungensis	42	130620	P	42	130620	-2	2.9e-12
Manglietia kwangtungensis	93	133054	F	93	133072	0	7.39e-47
Manglietia kwangtungensis	75	133054	F	75	133090	0	5.08e-36
Manglietia kwangtungensis	57	133054	F	57	133108	0	3.49e-25
Manglietia kwangtungensis	39	133054	F	39	133126	0	2.4e-14
Manglietia kwangtungensis	106	133815	F	106	133920	0	1.1e-54
Manglietia kwangtungensis	30	135287	F	30	135328	-2	2.46e-05
Manglietia kwangtungensis	33	153252	F	33	153276	0	9.82e-11
Manglietia kwangtungensis	42	155680	F	42	155701	-1	4.72e-14
Manglietia kwangtungensis	31	155691	F	31	155712	0	1.57e-09
Manglietia conifera	42	92838	F	42	92859	-1	4.69e-14
Manglietia conifera	42	92838	P	42	155160	-1	4.69e-14
Manglietia conifera	42	92859	P	42	155181	-1	4.69e-14
Manglietia conifera	42	155160	F	42	155181	-1	4.69e-14
Manglietia conifera	42	130277	P	42	130277	-2	2.88e-12
Manglietia conifera	33	95272	F	33	95296	0	9.75e-11
Manglietia conifera	33	95272	P	33	152732	0	9.75e-11
Manglietia conifera	33	95296	P	33	152756	0	9.75e-11
Manglietia conifera	33	152732	F	33	152756	0	9.75e-11
Manglietia conifera	39	46232	F	39	102712	-2	1.59e-10
Manglietia conifera	39	46232	P	39	145310	-2	1.59e-10
Manglietia conifera	41	41279	F	41	43503	-3	4.28e-10
Manglietia conifera	31	155171	F	31	155192	0	1.56e-09
Manglietia conifera	32	67788	P	32	67832	-1	3.75e-08
Manglietia conifera	37	128897	P	37	128897	-3	7.99e-08
Manglietia conifera	30	9262	P	30	47546	-1	5.62e-07
Manglietia conifera	31	9261	F	31	38086	-2	6.53e-06
Manglietia conifera	33	31524	P	33	31524	-3	1.44e-05
Manglietia conifera	30	113224	F	30	113265	-2	2.44e-05
Manglietia conifera	30	113224	P	30	134766	-2	2.44e-05
Manglietia conifera	30	113265	P	30	134807	-2	2.44e-05
Manglietia conifera	30	134767	F	30	134808	-2	2.44e-05
Manglietia conifera	30	38087	P	30	47546	-3	0.000684
Manglietia conifera	30	46244	F	30	102724	-3	0.000684
Manglietia conifera	30	46244	P	30	145307	-3	0.000684
Manglietia conifera	30	38087	P	30	47546	-3	0.000684
Manglietia conifera	30	46244	F	30	102724	-3	0.000684
Manglietia conifera	30	46244	P	30	145307	-3	0.000684
Manglietia crassipes	31	9275	F	31	38099	-2	6.53e-06
Manglietia crassipes	30	9276	P	30	47555	-1	5.61e-07
Manglietia crassipes	31	17496	P	31	17496	-1	1.45e-07
Manglietia crassipes	33	31553	P	33	31553	-3	1.44e-05
Manglietia crassipes	30	38100	P	30	47555	-3	0.000684
Manglietia crassipes	41	41293	F	41	43517	-3	4.28e-10
Manglietia crassipes	39	46244	F	39	102579	-2	1.59e-10
Manglietia crassipes	39	46244	P	39	145242	-2	1.59e-10
Manglietia crassipes	30	46256	F	30	102591	-3	0.000684
Manglietia crassipes	30	46256	P	30	145239	-3	0.000684
Manglietia crassipes	32	67671	P	32	67715	-1	3.74e-08
Manglietia crassipes	42	92705	F	42	92726	-1	4.68e-14
Manglietia crassipes	42	92705	P	42	155092	-1	4.68e-14
Manglietia crassipes	42	92726	P	42	155113	-1	4.68e-14
Manglietia crassipes	33	95139	F	33	95163	0	9.75e-11
Manglietia crassipes	33	95139	P	33	152664	0	9.75e-11
Manglietia crassipes	33	95163	P	33	152688	0	9.75e-11
Manglietia crassipes	30	113094	F	30	113135	-2	2.44e-05
Manglietia crassipes	30	113094	P	30	134695	-2	2.44e-05
Manglietia crassipes	30	113135	P	30	134736	-2	2.44e-05
Manglietia crassipes	37	128772	P	37	128772	-3	7.99e-08
Manglietia crassipes	42	130152	P	42	130152	-2	2.88e-12
Manglietia crassipes	75	132586	F	75	132604	0	5.04e-36
Manglietia crassipes	57	132586	F	57	132622	0	3.46e-25
Manglietia crassipes	39	132586	F	39	132640	0	2.38e-14
Manglietia crassipes	30	134696	F	30	134737	-2	2.44e-05
Manglietia crassipes	33	152664	F	33	152688	0	9.75e-11
Manglietia crassipes	42	155092	F	42	155113	-1	4.68e-14
Manglietia crassipes	31	155103	F	31	155124	0	1.56e-09
Manglietia dandyi	31	9270	F	31	38095	-2	6.71e-06
Manglietia dandyi	30	9271	P	30	47555	-1	5.77e-07
Manglietia dandyi	33	31532	P	33	31532	-3	1.48e-05
Manglietia dandyi	30	38096	P	30	47555	-3	0.000703
Manglietia dandyi	30	38096	P	30	47555	-3	0.000703
Manglietia dandyi	41	41288	F	41	43512	-3	4.4e-10
Manglietia dandyi	39	46240	F	39	102719	-2	1.63e-10
Manglietia dandyi	39	46240	P	39	145414	-2	1.63e-10
Manglietia dandyi	30	46252	F	30	102731	-3	0.000703
Manglietia dandyi	30	46252	P	30	145411	-3	0.000703
Manglietia dandyi	30	46252	F	30	102731	-3	0.000703
Manglietia dandyi	30	46252	P	30	145411	-3	0.000703
Manglietia dandyi	32	67788	P	32	67832	-1	3.85e-08
Manglietia dandyi	2017	88108	P	2017	160076	0	0
Manglietia dandyi	42	92845	F	42	92866	-1	4.81e-14
Manglietia dandyi	42	92845	P	42	155264	-1	4.81e-14
Manglietia dandyi	42	92866	P	42	155285	-1	4.81e-14
Manglietia dandyi	33	95279	F	33	95303	0	1e-10
Manglietia dandyi	33	95279	P	33	152836	0	1e-10
Manglietia dandyi	33	95303	P	33	152860	0	1e-10
Manglietia dandyi	30	113231	F	30	113272	-2	2.51e-05
Manglietia dandyi	30	113231	P	30	134870	-2	2.51e-05
Manglietia dandyi	30	113272	P	30	134911	-2	2.51e-05
Manglietia dandyi	37	128911	P	37	128911	-3	8.21e-08
Manglietia dandyi	111	132725	F	111	132743	0	1.1e-57
Manglietia dandyi	93	132725	F	93	132761	0	7.54e-47
Manglietia dandyi	75	132725	F	75	132779	0	5.18e-36
Manglietia dandyi	57	132725	F	57	132797	0	3.56e-25
Manglietia dandyi	39	132725	F	39	132815	0	2.45e-14
Manglietia dandyi	30	134871	F	30	134912	-2	2.51e-05
Manglietia dandyi	33	152836	F	33	152860	0	1e-10
Manglietia dandyi	42	155264	F	42	155285	-1	4.81e-14
Manglietia dandyi	31	155275	F	31	155296	0	1.6e-09
Manglietia dandyi	2017	158047	F	2017	160076	0	0
Manglietia duclouxii	31	9271	F	31	38091	-2	6.54e-06
Manglietia duclouxii	30	9272	P	30	47547	-1	5.62e-07
Manglietia duclouxii	33	31549	P	33	31549	-3	1.44e-05
Manglietia duclouxii	30	38092	P	30	47547	-3	0.000685
Manglietia duclouxii	30	38092	P	30	47547	-3	0.000685
Manglietia duclouxii	41	41285	F	41	43509	-3	4.29e-10
Manglietia duclouxii	39	46236	F	39	102741	-2	1.59e-10
Manglietia duclouxii	39	46236	P	39	145393	-2	1.59e-10
Manglietia duclouxii	30	46248	F	30	102753	-3	0.000685
Manglietia duclouxii	30	46248	P	30	145390	-3	0.000685
Manglietia duclouxii	30	46248	F	30	102753	-3	0.000685
Manglietia duclouxii	30	46248	P	30	145390	-3	0.000685
Manglietia duclouxii	32	67819	P	32	67863	-1	3.75e-08
Manglietia duclouxii	42	92867	F	42	92888	-1	4.69e-14
Manglietia duclouxii	42	92867	P	42	155243	-1	4.69e-14
Manglietia duclouxii	42	92888	P	42	155264	-1	4.69e-14
Manglietia duclouxii	33	95301	F	33	95325	0	9.76e-11
Manglietia duclouxii	33	95301	P	33	152815	0	9.76e-11
Manglietia duclouxii	33	95325	P	33	152839	0	9.76e-11
Manglietia duclouxii	30	113256	F	30	113297	-2	2.45e-05
Manglietia duclouxii	30	113256	P	30	134846	-2	2.45e-05
Manglietia duclouxii	30	113297	P	30	134887	-2	2.45e-05
Manglietia duclouxii	42	130321	P	42	130321	-2	2.89e-12
Manglietia duclouxii	57	132755	F	57	132773	0	3.47e-25
Manglietia duclouxii	39	132755	F	39	132791	0	2.38e-14
Manglietia duclouxii	30	134847	F	30	134888	-2	2.45e-05
Manglietia duclouxii	33	152815	F	33	152839	0	9.76e-11
Manglietia duclouxii	42	155243	F	42	155264	-1	4.69e-14
Manglietia duclouxii	31	155254	F	31	155275	0	1.56e-09
Manglietia fordiana	31	9269	F	31	38088	-2	6.54e-06
Manglietia fordiana	30	9270	P	30	47544	-1	5.63e-07
Manglietia fordiana	32	17488	P	32	17488	-2	1.74e-06
Manglietia fordiana	30	17490	P	30	17490	-2	2.45e-05
Manglietia fordiana	33	31547	P	33	31547	-3	1.44e-05
Manglietia fordiana	30	38089	P	30	47544	-3	0.000685
Manglietia fordiana	41	41282	F	41	43506	-3	4.29e-10
Manglietia fordiana	39	46233	F	39	102725	-2	1.59e-10
Manglietia fordiana	39	46233	P	39	145410	-2	1.59e-10
Manglietia fordiana	30	46245	F	30	102737	-3	0.000685
Manglietia fordiana	30	46245	P	30	145407	-3	0.000685
Manglietia fordiana	32	67813	P	32	67857	-1	3.75e-08
Manglietia fordiana	42	92851	F	42	92872	-1	4.69e-14
Manglietia fordiana	42	92851	P	42	155260	-1	4.69e-14
Manglietia fordiana	42	92872	P	42	155281	-1	4.69e-14
Manglietia fordiana	33	95285	F	33	95309	0	9.77e-11
Manglietia fordiana	33	95285	P	33	152832	0	9.77e-11
Manglietia fordiana	33	95309	P	33	152856	0	9.77e-11
Manglietia fordiana	30	113240	F	30	113281	-2	2.45e-05
Manglietia fordiana	30	113240	P	30	134863	-2	2.45e-05
Manglietia fordiana	30	113281	P	30	134904	-2	2.45e-05
Manglietia fordiana	37	128922	P	37	128922	-3	8e-08
Manglietia fordiana	42	130302	P	42	130302	-2	2.89e-12
Manglietia fordiana	93	132736	F	93	132754	-2	2.83e-42
Manglietia fordiana	75	132736	F	75	132772	-1	1.14e-33
Manglietia fordiana	57	132736	F	57	132790	-1	5.93e-23
Manglietia fordiana	39	132736	F	39	132808	-1	2.79e-12
Manglietia fordiana	31	132744	F	31	132816	0	1.56e-09
Manglietia fordiana	31	132762	F	31	132816	0	1.56e-09
Manglietia fordiana	31	132780	F	31	132816	0	1.56e-09
Manglietia fordiana	31	132798	F	31	132816	-1	1.45e-07
Manglietia fordiana	30	134864	F	30	134905	-2	2.45e-05
Manglietia fordiana	33	152832	F	33	152856	0	9.77e-11
Manglietia fordiana	42	155260	F	42	155281	-1	4.69e-14
Manglietia fordiana	31	155271	F	31	155292	0	1.56e-09
Manglietia glaucifolia	31	9274	F	31	38092	-2	6.54e-06
Manglietia glaucifolia	30	9275	P	30	47549	-1	5.62e-07
Manglietia glaucifolia	33	31537	P	33	31537	-3	1.44e-05
Manglietia glaucifolia	30	38093	P	30	47549	-3	0.000685
Manglietia glaucifolia	41	41285	F	41	43509	-3	4.29e-10
Manglietia glaucifolia	39	46237	F	39	102718	-2	1.59e-10
Manglietia glaucifolia	39	46237	P	39	145396	-2	1.59e-10
Manglietia glaucifolia	30	46249	F	30	102730	-3	0.000685
Manglietia glaucifolia	30	46249	P	30	145393	-3	0.000685
Manglietia glaucifolia	32	67790	P	32	67834	-1	3.75e-08
Manglietia glaucifolia	42	92844	F	42	92865	-1	4.69e-14
Manglietia glaucifolia	42	92844	P	42	155246	-1	4.69e-14
Manglietia glaucifolia	42	92865	P	42	155267	-1	4.69e-14
Manglietia glaucifolia	33	95278	F	33	95302	0	9.77e-11
Manglietia glaucifolia	33	95278	P	33	152818	0	9.77e-11
Manglietia glaucifolia	33	95302	P	33	152842	0	9.77e-11
Manglietia glaucifolia	30	113239	F	30	113280	-2	2.45e-05
Manglietia glaucifolia	30	113239	P	30	134843	-2	2.45e-05
Manglietia glaucifolia	30	113280	P	30	134884	-2	2.45e-05
Manglietia glaucifolia	37	128920	P	37	128920	-3	8e-08
Manglietia glaucifolia	42	130300	P	42	130300	-2	2.89e-12
Manglietia glaucifolia	75	132734	F	75	132752	0	5.05e-36
Manglietia glaucifolia	57	132734	F	57	132770	0	3.47e-25
Manglietia glaucifolia	39	132734	F	39	132788	0	2.38e-14
Manglietia glaucifolia	30	134844	F	30	134885	-2	2.45e-05
Manglietia glaucifolia	33	152818	F	33	152842	0	9.77e-11
Manglietia glaucifolia	42	155246	F	42	155267	-1	4.69e-14
Manglietia glaucifolia	31	155257	F	31	155278	0	1.56e-09
Manglietia aromatica2	31	9261	F	31	38085	-2	6.54e-06
Manglietia aromatica2	30	9262	P	30	47544	-1	5.62e-07
Manglietia aromatica2	33	31524	P	33	31524	-3	1.44e-05
Manglietia aromatica2	30	38086	P	30	47544	-3	0.000685
Manglietia aromatica2	41	41278	F	41	43502	-3	4.29e-10
Manglietia aromatica2	39	46230	F	39	102711	-2	1.59e-10
Manglietia aromatica2	39	46230	P	39	145399	-2	1.59e-10
Manglietia aromatica2	30	46242	F	30	102723	-3	0.000685
Manglietia aromatica2	30	46242	P	30	145396	-3	0.000685
Manglietia aromatica2	32	67786	P	32	67830	-1	3.75e-08
Manglietia aromatica2	42	92837	F	42	92858	-1	4.69e-14
Manglietia aromatica2	42	92837	P	42	155249	-1	4.69e-14
Manglietia aromatica2	42	92858	P	42	155270	-1	4.69e-14
Manglietia aromatica2	33	95271	F	33	95295	0	9.77e-11
Manglietia aromatica2	33	95271	P	33	152821	0	9.77e-11
Manglietia aromatica2	33	95295	P	33	152845	0	9.77e-11
Manglietia aromatica2	30	113223	F	30	113264	-2	2.45e-05
Manglietia aromatica2	30	113223	P	30	134855	-2	2.45e-05
Manglietia aromatica2	30	113264	P	30	134896	-2	2.45e-05
Manglietia aromatica2	37	128896	P	37	128896	-3	8e-08
Manglietia aromatica2	42	130276	P	42	130276	-2	2.89e-12
Manglietia aromatica2	111	132710	F	111	132728	0	1.07e-57
Manglietia aromatica2	93	132710	F	93	132746	0	7.35e-47
Manglietia aromatica2	75	132710	F	75	132764	0	5.05e-36
Manglietia aromatica2	57	132710	F	57	132782	0	3.47e-25
Manglietia aromatica2	39	132710	F	39	132800	0	2.38e-14
Manglietia aromatica2	30	134856	F	30	134897	-2	2.45e-05
Manglietia aromatica2	33	152821	F	33	152845	0	9.77e-11
Manglietia aromatica2	42	155249	F	42	155270	-1	4.69e-14
Manglietia aromatica2	31	155260	F	31	155281	0	1.56e-09
Manglietia calcarea3	31	9261	F	31	38086	-2	6.54e-06
Manglietia calcarea3	30	9262	P	30	47546	-1	5.62e-07
Manglietia calcarea3	33	31524	P	33	31524	-3	1.44e-05
Manglietia calcarea3	30	38087	P	30	47546	-3	0.000685
Manglietia calcarea3	30	38087	P	30	47546	-3	0.000685
Manglietia calcarea3	41	41279	F	41	43503	-3	4.29e-10
Manglietia calcarea3	39	46232	F	39	102712	-2	1.59e-10
Manglietia calcarea3	39	46232	P	39	145364	-2	1.59e-10
Manglietia calcarea3	30	46244	F	30	102724	-3	0.000685
Manglietia calcarea3	30	46244	P	30	145361	-3	0.000685
Manglietia calcarea3	30	46244	F	30	102724	-3	0.000685
Manglietia calcarea3	30	46244	P	30	145361	-3	0.000685
Manglietia calcarea3	32	67788	P	32	67832	-1	3.75e-08
Manglietia calcarea3	42	92838	F	42	92859	-1	4.69e-14
Manglietia calcarea3	42	92838	P	42	155214	-1	4.69e-14
Manglietia calcarea3	42	92859	P	42	155235	-1	4.69e-14
Manglietia calcarea3	33	95272	F	33	95296	0	9.76e-11
Manglietia calcarea3	33	95272	P	33	152786	0	9.76e-11
Manglietia calcarea3	33	95296	P	33	152810	0	9.76e-11
Manglietia calcarea3	30	113224	F	30	113265	-2	2.45e-05
Manglietia calcarea3	30	113224	P	30	134820	-2	2.45e-05
Manglietia calcarea3	30	113265	P	30	134861	-2	2.45e-05
Manglietia calcarea3	37	128897	P	37	128897	-3	8e-08
Manglietia calcarea3	42	130277	P	42	130277	-2	2.89e-12
Manglietia calcarea3	75	132711	F	75	132729	0	5.05e-36
Manglietia calcarea3	57	132711	F	57	132747	0	3.47e-25
Manglietia calcarea3	39	132711	F	39	132765	0	2.38e-14
Manglietia calcarea3	30	134821	F	30	134862	-2	2.45e-05
Manglietia calcarea3	33	152786	F	33	152810	0	9.76e-11
Manglietia calcarea3	42	155214	F	42	155235	-1	4.69e-14
Manglietia calcarea3	31	155225	F	31	155246	0	1.56e-09
Manglietia grandis	31	9641	F	31	38460	-2	6.53e-06
Manglietia grandis	30	9642	P	30	47917	-1	5.62e-07
Manglietia grandis	33	17860	P	33	17860	-3	1.44e-05
Manglietia grandis	31	17862	P	31	17862	-1	1.45e-07
Manglietia grandis	33	31918	P	33	31918	-3	1.44e-05
Manglietia grandis	30	38461	P	30	47917	-3	0.000685
Manglietia grandis	30	38461	P	30	47917	-3	0.000685
Manglietia grandis	41	41654	F	41	43878	-3	4.29e-10
Manglietia grandis	39	46605	F	39	103047	-2	1.59e-10
Manglietia grandis	39	46605	P	39	145713	-2	1.59e-10
Manglietia grandis	30	46617	F	30	103059	-3	0.000685
Manglietia grandis	30	46617	P	30	145710	-3	0.000685
Manglietia grandis	30	46617	F	30	103059	-3	0.000685
Manglietia grandis	30	46617	P	30	145710	-3	0.000685
Manglietia grandis	32	68126	P	32	68170	-1	3.75e-08
Manglietia grandis	42	93173	F	42	93194	-1	4.69e-14
Manglietia grandis	42	93173	P	42	155563	-1	4.69e-14
Manglietia grandis	42	93194	P	42	155584	-1	4.69e-14
Manglietia grandis	33	95607	F	33	95631	0	9.76e-11
Manglietia grandis	33	95607	P	33	153135	0	9.76e-11
Manglietia grandis	33	95631	P	33	153159	0	9.76e-11
Manglietia grandis	30	113562	F	30	113603	-2	2.45e-05
Manglietia grandis	30	113562	P	30	135166	-2	2.45e-05
Manglietia grandis	30	113603	P	30	135207	-2	2.45e-05
Manglietia grandis	37	129243	P	37	129243	-3	8e-08
Manglietia grandis	42	130623	P	42	130623	-2	2.88e-12
Manglietia grandis	75	133057	F	75	133075	0	5.05e-36
Manglietia grandis	57	133057	F	57	133093	0	3.47e-25
Manglietia grandis	39	133057	F	39	133111	0	2.38e-14
Manglietia grandis	30	135167	F	30	135208	-2	2.45e-05
Manglietia grandis	33	153135	F	33	153159	0	9.76e-11
Manglietia grandis	42	155563	F	42	155584	-1	4.69e-14
Manglietia grandis	31	155574	F	31	155595	0	1.56e-09
Manglietia hookeri	31	9271	F	31	38090	-2	6.54e-06
Manglietia hookeri	30	9272	P	30	47546	-1	5.62e-07
Manglietia hookeri	33	31548	P	33	31548	-3	1.44e-05
Manglietia hookeri	30	38091	P	30	47546	-3	0.000685
Manglietia hookeri	41	41284	F	41	43508	-3	4.29e-10
Manglietia hookeri	39	46235	F	39	102733	-2	1.59e-10
Manglietia hookeri	39	46235	P	39	145380	-2	1.59e-10
Manglietia hookeri	30	46247	F	30	102745	-3	0.000685
Manglietia hookeri	30	46247	P	30	145377	-3	0.000685
Manglietia hookeri	32	67820	P	32	67864	-1	3.75e-08
Manglietia hookeri	42	92859	F	42	92880	-1	4.69e-14
Manglietia hookeri	42	92859	P	42	155230	-1	4.69e-14
Manglietia hookeri	42	92880	P	42	155251	-1	4.69e-14
Manglietia hookeri	33	95293	F	33	95317	0	9.76e-11
Manglietia hookeri	33	95293	P	33	152802	0	9.76e-11
Manglietia hookeri	33	95317	P	33	152826	0	9.76e-11
Manglietia hookeri	30	113248	F	30	113289	-2	2.45e-05
Manglietia hookeri	30	113248	P	30	134833	-2	2.45e-05
Manglietia hookeri	30	113289	P	30	134874	-2	2.45e-05
Manglietia hookeri	37	128928	P	37	128928	-3	8e-08
Manglietia hookeri	42	130308	P	42	130308	-2	2.89e-12
Manglietia hookeri	57	132742	F	57	132760	0	3.47e-25
Manglietia hookeri	39	132742	F	39	132778	0	2.38e-14
Manglietia hookeri	30	134834	F	30	134875	-2	2.45e-05
Manglietia hookeri	33	152802	F	33	152826	0	9.76e-11
Manglietia hookeri	42	155230	F	42	155251	-1	4.69e-14
Manglietia hookeri	31	155241	F	31	155262	0	1.56e-09
Manglietia decidua	31	9262	F	31	38153	-2	6.55e-06
Manglietia decidua	30	9263	P	30	47612	-1	5.63e-07
Manglietia decidua	31	17505	P	31	17505	-3	0.00019
Manglietia decidua	33	31550	P	33	31550	-3	1.44e-05
Manglietia decidua	30	31908	F	30	31936	-2	2.45e-05
Manglietia decidua	30	38154	P	30	47612	-3	0.000686
Manglietia decidua	41	41344	F	41	43568	-3	4.29e-10
Manglietia decidua	39	46300	F	39	102818	-2	1.59e-10
Manglietia decidua	39	46300	P	39	145492	-2	1.59e-10
Manglietia decidua	30	46312	F	30	102830	-3	0.000686
Manglietia decidua	30	46312	P	30	145489	-3	0.000686
Manglietia decidua	32	67869	P	32	67913	-1	3.75e-08
Manglietia decidua	42	92944	F	42	92965	-1	4.7e-14
Manglietia decidua	42	92944	P	42	155342	-1	4.7e-14
Manglietia decidua	42	92965	P	42	155363	-1	4.7e-14
Manglietia decidua	33	95378	F	33	95402	0	9.78e-11
Manglietia decidua	33	95378	P	33	152914	0	9.78e-11
Manglietia decidua	33	95402	P	33	152938	0	9.78e-11
Manglietia decidua	30	113328	F	30	113369	-2	2.45e-05
Manglietia decidua	30	113328	P	30	134950	-2	2.45e-05
Manglietia decidua	30	113369	P	30	134991	-2	2.45e-05
Manglietia decidua	37	129027	P	37	129027	-3	8.01e-08
Manglietia decidua	42	130407	P	42	130407	-2	2.89e-12
Manglietia decidua	75	132841	F	75	132859	0	5.05e-36
Manglietia decidua	57	132841	F	57	132877	0	3.47e-25
Manglietia decidua	39	132841	F	39	132895	0	2.39e-14
Manglietia decidua	30	134951	F	30	134992	-2	2.45e-05
Manglietia decidua	33	152914	F	33	152938	0	9.78e-11
Manglietia decidua	42	155342	F	42	155363	-1	4.7e-14
Manglietia decidua	31	155353	F	31	155374	0	1.56e-09
Manglietia aromatica1	31	9376	F	31	38200	-2	6.57e-06
Manglietia aromatica1	30	9377	P	30	47659	-1	5.65e-07
Manglietia aromatica1	33	31639	P	33	31639	-3	1.45e-05
Manglietia aromatica1	30	38201	P	30	47659	-3	0.000688
Manglietia aromatica1	41	41393	F	41	43617	-3	4.31e-10
Manglietia aromatica1	39	46345	F	39	102924	-2	1.6e-10
Manglietia aromatica1	39	46345	P	39	145783	-2	1.6e-10
Manglietia aromatica1	30	46357	F	30	102936	-3	0.000688
Manglietia aromatica1	30	46357	P	30	145780	-3	0.000688
Manglietia aromatica1	32	67898	P	32	67942	-1	3.77e-08
Manglietia aromatica1	105	88195	F	105	88300	0	4.4e-54
Manglietia aromatica1	105	88195	P	105	160341	0	4.4e-54
Manglietia aromatica1	42	93050	F	42	93071	-1	4.72e-14
Manglietia aromatica1	42	93050	P	42	155633	-1	4.72e-14
Manglietia aromatica1	42	93071	P	42	155654	-1	4.72e-14
Manglietia aromatica1	33	95484	F	33	95508	0	9.81e-11
Manglietia aromatica1	33	95484	P	33	153205	0	9.81e-11
Manglietia aromatica1	33	95508	P	33	153229	0	9.81e-11
Manglietia aromatica1	30	113436	F	30	113477	-2	2.46e-05
Manglietia aromatica1	30	113436	P	30	135239	-2	2.46e-05
Manglietia aromatica1	30	113477	P	30	135280	-2	2.46e-05
Manglietia aromatica1	106	114767	P	106	133768	0	1.1e-54
Manglietia aromatica1	105	114767	F	105	114872	0	4.4e-54
Manglietia aromatica1	105	114872	P	105	133874	0	4.4e-54
Manglietia aromatica1	37	129229	P	37	129229	-3	8.04e-08
Manglietia aromatica1	42	130609	P	42	130609	-2	2.9e-12
Manglietia aromatica1	57	133043	F	57	133061	0	3.49e-25
Manglietia aromatica1	39	133043	F	39	133079	0	2.4e-14
Manglietia aromatica1	106	133768	F	106	133873	0	1.1e-54
Manglietia aromatica1	30	135240	F	30	135281	-2	2.46e-05
Manglietia aromatica1	33	153205	F	33	153229	0	9.81e-11
Manglietia aromatica1	42	155633	F	42	155654	-1	4.72e-14
Manglietia aromatica1	31	155644	F	31	155665	0	1.57e-09

## Sheet: Table S3
Table S3 The tandem repeats distribution in twenty-two Manglietia plastomes.
Species	Start	End	Total Length	Consensus Size (bp)	Copy Number
Manglietia aromatica 2	14116	14159	44	20	2.2
Manglietia aromatica 2	14116	14159	44	20	2.2
Manglietia aromatica 2	34730	34765	36	18	2
Manglietia aromatica 2	45035	45076	42	21	2
Manglietia aromatica 2	49108	49138	31	16	2
Manglietia aromatica 2	50726	50765	40	20	2
Manglietia aromatica 2	62716	62751	36	16	2.3
Manglietia aromatica 2	71914	71957	44	21	2.1
Manglietia aromatica 2	73056	73104	49	15	3.3
Manglietia aromatica 2	83226	83273	48	24	2
Manglietia aromatica 2	90555	90585	31	15	2.1
Manglietia aromatica 2	92818	92906	89	21	4.1
Manglietia aromatica 2	95272	95328	57	24	2.4
Manglietia aromatica 2	113228	113293	66	18	3.4
Manglietia aromatica 2	132711	132839	129	18	7.2
Manglietia aromatica 2	134857	134922	66	18	3.4
Manglietia aromatica 2	152822	152878	57	24	2.4
Manglietia aromatica 2	155244	155332	89	21	4.1
Manglietia aromatica 2	157565	157595	31	15	2.1
Manglietia dandyi	6419	6449	31	15	2.1
Manglietia dandyi	14125	14168	44	20	2.2
Manglietia dandyi	14125	14168	44	20	2.2
Manglietia dandyi	34738	34773	36	18	2
Manglietia dandyi	45045	45086	42	21	2
Manglietia dandyi	49112	49142	31	16	2
Manglietia dandyi	50731	50770	40	20	2
Manglietia dandyi	62718	62753	36	16	2.3
Manglietia dandyi	71919	71962	44	21	2.1
Manglietia dandyi	73061	73109	49	15	3.3
Manglietia dandyi	83233	83280	48	24	2
Manglietia dandyi	90563	90593	31	15	2.1
Manglietia dandyi	92826	92914	89	21	4.1
Manglietia dandyi	95280	95336	57	24	2.4
Manglietia dandyi	113236	113301	66	18	3.4
Manglietia dandyi	132726	132854	129	18	7.2
Manglietia dandyi	134872	134937	66	18	3.4
Manglietia dandyi	152837	152893	57	24	2.4
Manglietia dandyi	155259	155347	89	21	4.1
Manglietia dandyi	157580	157610	31	15	2.1
Manglietia crassipes	6426	6456	31	15	2.1
Manglietia crassipes	14126	14169	44	20	2.2
Manglietia crassipes	14126	14169	44	20	2.2
Manglietia crassipes	28679	28706	28	9	3.1
Manglietia crassipes	45050	45091	42	21	2
Manglietia crassipes	50611	50650	40	20	2
Manglietia crassipes	62602	62637	36	16	2.3
Manglietia crassipes	71803	71846	44	21	2.1
Manglietia crassipes	72946	72994	49	15	3.3
Manglietia crassipes	83107	83154	48	24	2
Manglietia crassipes	90423	90453	31	15	2.1
Manglietia crassipes	92686	92774	89	21	4.1
Manglietia crassipes	95140	95196	57	24	2.4
Manglietia crassipes	113099	113164	66	18	3.4
Manglietia crassipes	132587	132679	93	18	5.2
Manglietia crassipes	134697	134762	66	18	3.4
Manglietia crassipes	152665	152721	57	24	2.4
Manglietia crassipes	155087	155175	89	21	4.1
Manglietia crassipes	157408	157438	31	15	2.1
Manglietia conifera	14116	14159	44	20	2.2
Manglietia conifera	14116	14159	44	20	2.2
Manglietia conifera	34731	34766	36	18	2
Manglietia conifera	45036	45077	42	21	2
Manglietia conifera	49110	49140	31	16	2
Manglietia conifera	50728	50767	40	20	2
Manglietia conifera	62718	62753	36	16	2.3
Manglietia conifera	71916	71959	44	21	2.1
Manglietia conifera	73058	73106	49	15	3.3
Manglietia conifera	83227	83274	48	24	2
Manglietia conifera	90556	90586	31	15	2.1
Manglietia conifera	92819	92907	89	21	4.1
Manglietia conifera	95273	95329	57	24	2.4
Manglietia conifera	113229	113294	66	18	3.4
Manglietia conifera	132712	132750	39	18	2.2
Manglietia conifera	132717	132756	40	18	2.2
Manglietia conifera	134768	134833	66	18	3.4
Manglietia conifera	152733	152789	57	24	2.4
Manglietia conifera	155155	155243	89	21	4.1
Manglietia conifera	157476	157506	31	15	2.1
Manglietia fordiana	6420	6450	31	15	2.1
Manglietia fordiana	14120	14163	44	20	2.2
Manglietia fordiana	14120	14163	44	20	2.2
Manglietia fordiana	28672	28699	28	9	3.1
Manglietia fordiana	45039	45080	42	21	2
Manglietia fordiana	49128	49158	31	16	2
Manglietia fordiana	50753	50792	40	20	2
Manglietia fordiana	62744	62779	36	16	2.3
Manglietia fordiana	71946	71989	44	21	2.1
Manglietia fordiana	73089	73137	49	15	3.3
Manglietia fordiana	83251	83298	48	24	2
Manglietia fordiana	90569	90599	31	15	2.1
Manglietia fordiana	92832	92920	89	21	4.1
Manglietia fordiana	95286	95342	57	24	2.4
Manglietia fordiana	113245	113310	66	18	3.4
Manglietia fordiana	132737	132847	111	18	6.2
Manglietia fordiana	134865	134930	66	18	3.4
Manglietia fordiana	152833	152889	57	24	2.4
Manglietia fordiana	155255	155343	89	21	4.1
Manglietia fordiana	157576	157606	31	15	2.1
Manglietia calcarea3	14116	14159	44	20	2.2
Manglietia calcarea3	14116	14159	44	20	2.2
Manglietia calcarea3	34731	34766	36	18	2
Manglietia calcarea3	45036	45077	42	21	2
Manglietia calcarea3	49110	49140	31	16	2
Manglietia calcarea3	50728	50767	40	20	2
Manglietia calcarea3	62718	62753	36	16	2.3
Manglietia calcarea3	71916	71959	44	21	2.1
Manglietia calcarea3	73058	73106	49	15	3.3
Manglietia calcarea3	83227	83274	48	24	2
Manglietia calcarea3	90556	90586	31	15	2.1
Manglietia calcarea3	92819	92907	89	21	4.1
Manglietia calcarea3	95273	95329	57	24	2.4
Manglietia calcarea3	113229	113294	66	18	3.4
Manglietia calcarea3	132712	132804	93	18	5.2
Manglietia calcarea3	134822	134887	66	18	3.4
Manglietia calcarea3	152787	152843	57	24	2.4
Manglietia calcarea3	155209	155297	89	21	4.1
Manglietia calcarea3	157530	157560	31	15	2.1
Manglietia duclouxii	6423	6453	31	15	2.1
Manglietia duclouxii	14123	14166	44	20	2.2
Manglietia duclouxii	14123	14166	44	20	2.2
Manglietia duclouxii	28676	28703	28	9	3.1
Manglietia duclouxii	45042	45083	42	21	2
Manglietia duclouxii	49133	49163	31	16	2
Manglietia duclouxii	50759	50798	40	20	2
Manglietia duclouxii	62750	62785	36	16	2.3
Manglietia duclouxii	71951	71994	44	21	2.1
Manglietia duclouxii	73094	73142	49	15	3.3
Manglietia duclouxii	83259	83306	48	24	2
Manglietia duclouxii	90585	90615	31	15	2.1
Manglietia duclouxii	92848	92936	89	21	4.1
Manglietia duclouxii	95302	95358	57	24	2.4
Manglietia duclouxii	113261	113326	66	18	3.4
Manglietia duclouxii	132756	132830	75	18	4.2
Manglietia duclouxii	134848	134913	66	18	3.4
Manglietia duclouxii	152816	152872	57	24	2.4
Manglietia duclouxii	155238	155326	89	21	4.1
Manglietia duclouxii	157559	157589	31	15	2.1
Manglietia glaucifolia	6422	6452	31	15	2.1
Manglietia glaucifolia	14129	14172	44	20	2.2
Manglietia glaucifolia	14129	14172	44	20	2.2
Manglietia glaucifolia	34744	34779	36	18	2
Manglietia glaucifolia	45042	45083	42	21	2
Manglietia glaucifolia	49112	49142	31	16	2
Manglietia glaucifolia	50730	50769	40	20	2
Manglietia glaucifolia	62721	62756	36	16	2.3
Manglietia glaucifolia	71920	71963	44	21	2.1
Manglietia glaucifolia	73062	73110	49	15	3.3
Manglietia glaucifolia	83233	83280	48	24	2
Manglietia glaucifolia	90562	90592	31	15	2.1
Manglietia glaucifolia	92825	92913	89	21	4.1
Manglietia glaucifolia	95279	95335	57	24	2.4
Manglietia glaucifolia	113244	113309	66	18	3.4
Manglietia glaucifolia	132735	132827	93	18	5.2
Manglietia glaucifolia	134845	134910	66	18	3.4
Manglietia glaucifolia	152819	152875	57	24	2.4
Manglietia glaucifolia	155241	155329	89	21	4.1
Manglietia glaucifolia	157562	157592	31	15	2.1
Manglietia grandis	6791	6821	31	15	2.1
Manglietia grandis	14492	14535	44	20	2.2
Manglietia grandis	14492	14535	44	20	2.2
Manglietia grandis	29045	29072	28	9	3.1
Manglietia grandis	45411	45452	42	21	2
Manglietia grandis	49435	49465	31	16	2
Manglietia grandis	51066	51105	40	20	2
Manglietia grandis	63057	63092	36	16	2.3
Manglietia grandis	72257	72300	44	21	2.1
Manglietia grandis	73400	73448	49	15	3.3
Manglietia grandis	83567	83614	48	24	2
Manglietia grandis	90891	90921	31	15	2.1
Manglietia grandis	93154	93242	89	21	4.1
Manglietia grandis	95608	95664	57	24	2.4
Manglietia grandis	113567	113632	66	18	3.4
Manglietia grandis	133058	133150	93	18	5.2
Manglietia grandis	135168	135233	66	18	3.4
Manglietia grandis	153136	153192	57	24	2.4
Manglietia grandis	155558	155646	89	21	4.1
Manglietia grandis	157879	157909	31	15	2.1
Manglietia lucida	6423	6453	31	15	2.1
Manglietia lucida	14132	14175	44	20	2.2
Manglietia lucida	14132	14175	44	20	2.2
Manglietia lucida	34753	34788	36	18	2
Manglietia lucida	45051	45092	42	21	2
Manglietia lucida	49123	49153	31	16	2
Manglietia lucida	50741	50780	40	20	2
Manglietia lucida	62732	62767	36	16	2.3
Manglietia lucida	71939	71982	44	21	2.1
Manglietia lucida	73081	73129	49	15	3.3
Manglietia lucida	83252	83299	48	24	2
Manglietia lucida	90587	90617	31	15	2.1
Manglietia lucida	92850	92938	89	21	4.1
Manglietia lucida	95304	95360	57	24	2.4
Manglietia lucida	102986	103031	46	23	2
Manglietia lucida	113283	113348	66	18	3.4
Manglietia lucida	131385	131428	44	21	2.1
Manglietia lucida	132796	132888	93	18	5.2
Manglietia lucida	134906	134971	66	18	3.4
Manglietia lucida	145223	145268	46	23	2
Manglietia lucida	152894	152950	57	24	2.4
Manglietia lucida	155316	155404	89	21	4.1
Manglietia lucida	157637	157667	31	15	2.1
Manglietia insignis	6425	6455	31	15	2.1
Manglietia insignis	14125	14168	44	20	2.2
Manglietia insignis	14125	14168	44	20	2.2
Manglietia insignis	28378	28406	29	14	2.1
Manglietia insignis	28692	28719	28	9	3.1
Manglietia insignis	45055	45096	42	21	2
Manglietia insignis	49146	49176	31	16	2
Manglietia insignis	50772	50811	40	20	2
Manglietia insignis	62762	62797	36	16	2.3
Manglietia insignis	71974	72017	44	21	2.1
Manglietia insignis	73117	73165	49	15	3.3
Manglietia insignis	83283	83330	48	24	2
Manglietia insignis	90608	90638	31	15	2.1
Manglietia insignis	92871	92959	89	21	4.1
Manglietia insignis	95325	95381	57	24	2.4
Manglietia insignis	113291	113356	66	18	3.4
Manglietia insignis	132779	132817	39	18	2.2
Manglietia insignis	132784	132823	40	18	2.2
Manglietia insignis	134835	134900	66	18	3.4
Manglietia insignis	152810	152866	57	24	2.4
Manglietia insignis	155232	155320	89	21	4.1
Manglietia insignis	157553	157583	31	15	2.1
Manglietia hookeri	6421	6451	31	15	2.1
Manglietia hookeri	14123	14166	44	20	2.2
Manglietia hookeri	14123	14166	44	20	2.2
Manglietia hookeri	28676	28703	28	9	3.1
Manglietia hookeri	45041	45082	42	21	2
Manglietia hookeri	49134	49164	31	16	2
Manglietia hookeri	50760	50799	40	20	2
Manglietia hookeri	62751	62786	36	16	2.3
Manglietia hookeri	71946	71989	44	21	2.1
Manglietia hookeri	73089	73137	49	15	3.3
Manglietia hookeri	83252	83299	48	24	2
Manglietia hookeri	90577	90607	31	15	2.1
Manglietia hookeri	92840	92928	89	21	4.1
Manglietia hookeri	95294	95350	57	24	2.4
Manglietia hookeri	113253	113318	66	18	3.4
Manglietia hookeri	132743	132817	75	18	4.2
Manglietia hookeri	134835	134900	66	18	3.4
Manglietia hookeri	152803	152859	57	24	2.4
Manglietia hookeri	155225	155313	89	21	4.1
Manglietia hookeri	157546	157576	31	15	2.1
Manglietia patungensis	6418	6448	31	15	2.1
Manglietia patungensis	14122	14165	44	20	2.2
Manglietia patungensis	14122	14165	44	20	2.2
Manglietia patungensis	34737	34772	36	18	2
Manglietia patungensis	45044	45085	42	21	2
Manglietia patungensis	49117	49147	31	16	2
Manglietia patungensis	50734	50773	40	20	2
Manglietia patungensis	62724	62759	36	16	2.3
Manglietia patungensis	71925	71968	44	21	2.1
Manglietia patungensis	73067	73115	49	15	3.3
Manglietia patungensis	83242	83289	48	24	2
Manglietia patungensis	90570	90600	31	15	2.1
Manglietia patungensis	92833	92921	89	21	4.1
Manglietia patungensis	95287	95343	57	24	2.4
Manglietia patungensis	113243	113308	66	18	3.4
Manglietia patungensis	114710	114795	86	38	2.3
Manglietia patungensis	132770	132916	147	18	8.2
Manglietia patungensis	134934	134999	66	18	3.4
Manglietia patungensis	152899	152955	57	24	2.4
Manglietia patungensis	155321	155409	89	21	4.1
Manglietia patungensis	157642	157672	31	15	2.1
Manglietia ventii	6426	6456	31	15	2.1
Manglietia ventii	14126	14169	44	20	2.2
Manglietia ventii	14126	14169	44	20	2.2
Manglietia ventii	28679	28706	28	9	3.1
Manglietia ventii	45050	45091	42	21	2
Manglietia ventii	49034	49064	31	16	2
Manglietia ventii	50660	50699	40	20	2
Manglietia ventii	62651	62686	36	16	2.3
Manglietia ventii	71852	71895	44	21	2.1
Manglietia ventii	72995	73043	49	15	3.3
Manglietia ventii	83156	83203	48	24	2
Manglietia ventii	90472	90502	31	15	2.1
Manglietia ventii	92735	92823	89	21	4.1
Manglietia ventii	95189	95245	57	24	2.4
Manglietia ventii	113148	113213	66	18	3.4
Manglietia ventii	132636	132728	93	18	5.2
Manglietia ventii	134746	134811	66	18	3.4
Manglietia ventii	152714	152770	57	24	2.4
Manglietia ventii	155136	155224	89	21	4.1
Manglietia ventii	157457	157487	31	15	2.1
Manglietia zhengyiana	6419	6449	31	15	2.1
Manglietia zhengyiana	14125	14168	44	20	2.2
Manglietia zhengyiana	14125	14168	44	20	2.2
Manglietia zhengyiana	34738	34773	36	18	2
Manglietia zhengyiana	45045	45086	42	21	2
Manglietia zhengyiana	49112	49142	31	16	2
Manglietia zhengyiana	50731	50770	40	20	2
Manglietia zhengyiana	62717	62752	36	16	2.3
Manglietia zhengyiana	71918	71961	44	21	2.1
Manglietia zhengyiana	73060	73108	49	15	3.3
Manglietia zhengyiana	83232	83279	48	24	2
Manglietia zhengyiana	90562	90592	31	15	2.1
Manglietia zhengyiana	92825	92913	89	21	4.1
Manglietia zhengyiana	95279	95335	57	24	2.4
Manglietia zhengyiana	113235	113300	66	18	3.4
Manglietia zhengyiana	132725	132835	111	18	6.2
Manglietia zhengyiana	134853	134918	66	18	3.4
Manglietia zhengyiana	152818	152874	57	24	2.4
Manglietia zhengyiana	155240	155328	89	21	4.1
Manglietia zhengyiana	157561	157591	31	15	2.1
Manglietia obovalifolia	6422	6452	31	15	2.1
Manglietia obovalifolia	14118	14161	44	20	2.2
Manglietia obovalifolia	14118	14161	44	20	2.2
Manglietia obovalifolia	28671	28698	28	9	3.1
Manglietia obovalifolia	45038	45079	42	21	2
Manglietia obovalifolia	49131	49161	31	16	2
Manglietia obovalifolia	50757	50796	40	20	2
Manglietia obovalifolia	62748	62783	36	16	2.3
Manglietia obovalifolia	71950	71993	44	21	2.1
Manglietia obovalifolia	73093	73141	49	15	3.3
Manglietia obovalifolia	83256	83303	48	24	2
Manglietia obovalifolia	90582	90612	31	15	2.1
Manglietia obovalifolia	92845	92933	89	21	4.1
Manglietia obovalifolia	95299	95355	57	24	2.4
Manglietia obovalifolia	113258	113323	66	18	3.4
Manglietia obovalifolia	132754	132846	93	18	5.2
Manglietia obovalifolia	134864	134929	66	18	3.4
Manglietia obovalifolia	152832	152888	57	24	2.4
Manglietia obovalifolia	155254	155342	89	21	4.1
Manglietia obovalifolia	157575	157605	31	15	2.1
Manglietia calcarea2	14221	14264	44	20	2.2
Manglietia calcarea2	14221	14264	44	20	2.2
Manglietia calcarea2	34836	34871	36	18	2
Manglietia calcarea2	45141	45182	42	21	2
Manglietia calcarea2	49214	49244	31	16	2
Manglietia calcarea2	50832	50871	40	20	2
Manglietia calcarea2	62823	62858	36	16	2.3
Manglietia calcarea2	72021	72064	44	21	2.1
Manglietia calcarea2	73163	73211	49	15	3.3
Manglietia calcarea2	83332	83379	48	24	2
Manglietia calcarea2	88194	88403	210	105	2
Manglietia calcarea2	90766	90796	31	15	2.1
Manglietia calcarea2	93029	93117	89	21	4.1
Manglietia calcarea2	95483	95539	57	24	2.4
Manglietia calcarea2	111753	111818	66	18	3.4
Manglietia calcarea2	113080	113289	210	105	2
Manglietia calcarea2	131341	131451	111	18	6.2
Manglietia calcarea2	132102	132312	211	105	2
Manglietia calcarea2	133574	133639	66	18	3.4
Manglietia calcarea2	149853	149909	57	24	2.4
Manglietia calcarea2	152275	152363	89	21	4.1
Manglietia calcarea2	154596	154626	31	15	2.1
Manglietia kwangtungensis	6527	6557	31	15	2.1
Manglietia kwangtungensis	14233	14276	44	20	2.2
Manglietia kwangtungensis	14233	14276	44	20	2.2
Manglietia kwangtungensis	34848	34883	36	18	2
Manglietia kwangtungensis	45155	45196	42	21	2
Manglietia kwangtungensis	49226	49256	31	16	2
Manglietia kwangtungensis	50843	50882	40	20	2
Manglietia kwangtungensis	62833	62868	36	16	2.3
Manglietia kwangtungensis	72040	72083	44	21	2.1
Manglietia kwangtungensis	73182	73230	49	15	3.3
Manglietia kwangtungensis	83351	83398	48	24	2
Manglietia kwangtungensis	88215	88424	210	105	2
Manglietia kwangtungensis	90787	90817	31	15	2.1
Manglietia kwangtungensis	93050	93138	89	21	4.1
Manglietia kwangtungensis	95504	95560	57	24	2.4
Manglietia kwangtungensis	113460	113525	66	18	3.4
Manglietia kwangtungensis	114787	114996	210	105	2
Manglietia kwangtungensis	133055	133165	111	18	6.2
Manglietia kwangtungensis	133816	134026	211	105	2
Manglietia kwangtungensis	135288	135353	66	18	3.4
Manglietia kwangtungensis	153253	153309	57	24	2.4
Manglietia kwangtungensis	155675	155763	89	21	4.1
Manglietia kwangtungensis	157996	158026	31	15	2.1
Manglietia glauca	6529	6559	31	15	2.1
Manglietia glauca	14235	14278	44	20	2.2
Manglietia glauca	14235	14278	44	20	2.2
Manglietia glauca	34834	34869	36	18	2
Manglietia glauca	45141	45182	42	21	2
Manglietia glauca	49211	49241	31	16	2
Manglietia glauca	50829	50868	40	20	2
Manglietia glauca	62817	62852	36	16	2.3
Manglietia glauca	72020	72063	44	21	2.1
Manglietia glauca	73162	73210	49	15	3.3
Manglietia glauca	83331	83378	48	24	2
Manglietia glauca	88194	88403	210	105	2
Manglietia glauca	90766	90796	31	15	2.1
Manglietia glauca	93029	93117	89	21	4.1
Manglietia glauca	95483	95539	57	24	2.4
Manglietia glauca	113439	113504	66	18	3.4
Manglietia glauca	114766	114975	210	105	2
Manglietia glauca	132710	132753	44	23	1.9
Manglietia glauca	133039	133131	93	18	5.2
Manglietia glauca	133782	133992	211	105	2
Manglietia glauca	135254	135319	66	18	3.4
Manglietia glauca	153219	153275	57	24	2.4
Manglietia glauca	155641	155729	89	21	4.1
Manglietia glauca	157962	157992	31	15	2.1
Manglietia calcarea1	14221	14264	44	20	2.2
Manglietia calcarea1	14221	14264	44	20	2.2
Manglietia calcarea1	34836	34871	36	18	2
Manglietia calcarea1	45141	45182	42	21	2
Manglietia calcarea1	49215	49245	31	16	2
Manglietia calcarea1	50833	50872	40	20	2
Manglietia calcarea1	62823	62858	36	16	2.3
Manglietia calcarea1	72021	72064	44	21	2.1
Manglietia calcarea1	73163	73211	49	15	3.3
Manglietia calcarea1	83332	83379	48	24	2
Manglietia calcarea1	88193	88402	210	105	2
Manglietia calcarea1	90765	90795	31	15	2.1
Manglietia calcarea1	93028	93116	89	21	4.1
Manglietia calcarea1	95482	95538	57	24	2.4
Manglietia calcarea1	113438	113503	66	18	3.4
Manglietia calcarea1	114765	114974	210	105	2
Manglietia calcarea1	133026	133118	93	18	5.2
Manglietia calcarea1	133769	133979	211	105	2
Manglietia calcarea1	135241	135306	66	18	3.4
Manglietia calcarea1	153206	153262	57	24	2.4
Manglietia calcarea1	155628	155716	89	21	4.1
Manglietia calcarea1	157949	157979	31	15	2.1
Manglietia aromatica1	6525	6555	31	15	2.1
Manglietia aromatica1	14231	14274	44	20	2.2
Manglietia aromatica1	14231	14274	44	20	2.2
Manglietia aromatica1	34845	34880	36	18	2
Manglietia aromatica1	45150	45191	42	21	2
Manglietia aromatica1	49222	49252	31	16	2
Manglietia aromatica1	50840	50879	40	20	2
Manglietia aromatica1	62829	62864	36	16	2.3
Manglietia aromatica1	72022	72065	44	21	2.1
Manglietia aromatica1	73164	73212	49	15	3.3
Manglietia aromatica1	83334	83381	48	24	2
Manglietia aromatica1	88196	88405	210	105	2
Manglietia aromatica1	90768	90798	31	15	2.1
Manglietia aromatica1	93031	93119	89	21	4.1
Manglietia aromatica1	95485	95541	57	24	2.4
Manglietia aromatica1	113441	113506	66	18	3.4
Manglietia aromatica1	114768	114977	210	105	2
Manglietia aromatica1	133044	133118	75	18	4.2
Manglietia aromatica1	133769	133979	211	105	2
Manglietia aromatica1	135241	135306	66	18	3.4
Manglietia aromatica1	153206	153262	57	24	2.4
Manglietia aromatica1	155628	155716	89	21	4.1
Manglietia aromatica1	157949	157979	31	15	2.1
Manglietia decidua	6417	6447	31	15	2.1
Manglietia decidua	14120	14163	44	20	2.2
Manglietia decidua	14120	14163	44	20	2.2
Manglietia decidua	31909	31964	56	28	2
Manglietia decidua	32801	32846	46	23	2
Manglietia decidua	45105	45146	42	21	2
Manglietia decidua	50805	50844	40	20	2
Manglietia decidua	62805	62840	36	16	2.3
Manglietia decidua	71400	71447	48	24	2
Manglietia decidua	72031	72074	44	21	2.1
Manglietia decidua	73173	73221	49	15	3.3
Manglietia decidua	83337	83384	48	24	2
Manglietia decidua	90662	90692	31	15	2.1
Manglietia decidua	92925	93013	89	21	4.1
Manglietia decidua	95379	95435	57	24	2.4
Manglietia decidua	113333	113398	66	18	3.4
Manglietia decidua	114758	114782	25	12	2.1
Manglietia decidua	132842	132934	93	18	5.2
Manglietia decidua	134952	135017	66	18	3.4
Manglietia decidua	152915	152971	57	24	2.4
Manglietia decidua	155337	155425	89	21	4.1
Manglietia decidua	157658	157688	31	15	2.1

## Sheet: Table S4
Table S4 Simple sequence repeats distribution in twenty-two Manglietia plastomes.
Species	No	SSR type	Start	End
Manglietia fordiana	1	(A)10	10	1726
Manglietia fordiana	2	(A)10	10	3938
Manglietia fordiana	3	(AAAT)4	16	4394
Manglietia fordiana	4	(T)12	12	4582
Manglietia fordiana	5	(A)11	11	5393
Manglietia fordiana	6	(C)10	10	7188
Manglietia fordiana	7	(T)11	11	7771
Manglietia fordiana	8	(TA)5	10	9441
Manglietia fordiana	9	(T)10	10	10260
Manglietia fordiana	10	(A)14	14	12758
Manglietia fordiana	11	(A)10	10	13848
Manglietia fordiana	12	(T)10(A)12	22	17495
Manglietia fordiana	13	(T)12	12	19698
Manglietia fordiana	14	(AT)5	10	21072
Manglietia fordiana	15	(A)10	10	30549
Manglietia fordiana	16	(T)15	15	31336
Manglietia fordiana	17	(AT)5	10	33319
Manglietia fordiana	18	(TA)6	12	34973
Manglietia fordiana	19	(A)10	10	38863
Manglietia fordiana	20	(GAA)4	12	39315
Manglietia fordiana	21	(TAAA)3	12	46899
Manglietia fordiana	22	(A)11	11	50246
Manglietia fordiana	23	(T)10	10	55688
Manglietia fordiana	24	(ATA)4	12	57904
Manglietia fordiana	25	(G)10	10	58399
Manglietia fordiana	26	(TA)5	10	60234
Manglietia fordiana	27	(TC)5	10	64963
Manglietia fordiana	28	(AATG)3	12	65573
Manglietia fordiana	29	(T)11	11	70281
Manglietia fordiana	30	(C)12(T)10	22	71243
Manglietia fordiana	31	(TTC)4	12	71551
Manglietia fordiana	32	(TA)6	12	71856
Manglietia fordiana	33	(T)10	10	72386
Manglietia fordiana	34	(ATAA)3	12	73127
Manglietia fordiana	35	(T)11	11	75490
Manglietia fordiana	36	(T)12	12	84968
Manglietia fordiana	37	(ACAT)3	12	87679
Manglietia fordiana	38	(TATTAG)3	18	103620
Manglietia fordiana	39	(A)12	12	112094
Manglietia fordiana	40	(AATT)3	12	115061
Manglietia fordiana	41	(AAAT)3	12	117034
Manglietia fordiana	42	(C)10	10	118557
Manglietia fordiana	43	(T)10	10	119644
Manglietia fordiana	44	(T)10	10	122817
Manglietia fordiana	45	(T)10	10	124180
Manglietia fordiana	46	(A)11	11	126110
Manglietia fordiana	47	(AATC)3	12	126422
Manglietia fordiana	48	(TC)5ttttttttctttcttttccacagatatggattttaccgatcagg(AAT)4	66	128798
Manglietia fordiana	49	(CATT)3	12	130966
Manglietia fordiana	50	(A)10	10	132536
Manglietia fordiana	51	(T)12	12	136070
Manglietia fordiana	52	(ACTAAT)3	18	144537
Manglietia calcarea3	1	(A)12	211	222
Manglietia calcarea3	2	(A)10	3942	3951
Manglietia calcarea3	3	(AAAT)4	4398	4413
Manglietia calcarea3	4	(T)12	4586	4597
Manglietia calcarea3	5	(A)10	4755	4764
Manglietia calcarea3	6	(T)10ggaaggaat(A)12	5379	5409
Manglietia calcarea3	7	(C)12	7177	7188
Manglietia calcarea3	8	(T)12	7762	7773
Manglietia calcarea3	9	(TA)5	9433	9442
Manglietia calcarea3	10	(T)11aagttggatcaacccttccaattgaatgagtataagtaaaggatccatggatgaagatacaaaaatgtatttctaatcgtaactagatcttcca(T)11	10252	10367
Manglietia calcarea3	11	(A)15	12753	12767
Manglietia calcarea3	12	(A)10	13844	13853
Manglietia calcarea3	13	(A)12	17499	17510
Manglietia calcarea3	14	(T)12	19692	19703
Manglietia calcarea3	15	(AT)5	20444	20453
Manglietia calcarea3	16	(AT)5	21066	21075
Manglietia calcarea3	17	(T)11	31317	31327
Manglietia calcarea3	18	(AT)5	33302	33311
Manglietia calcarea3	19	(TA)6	34971	34982
Manglietia calcarea3	20	(GAA)4	39312	39323
Manglietia calcarea3	21	(T)11	45377	45387
Manglietia calcarea3	22	(TAAA)3(A)11*	46898	46917
Manglietia calcarea3	23	(G)10	47808	47817
Manglietia calcarea3	24	(A)10	50222	50231
Manglietia calcarea3	25	(T)10	53499	53508
Manglietia calcarea3	26	(T)10	55662	55671
Manglietia calcarea3	27	(ATA)4	57878	57889
Manglietia calcarea3	28	(G)12	58372	58383
Manglietia calcarea3	29	(TA)5	60209	60218
Manglietia calcarea3	30	(A)11	64730	64740
Manglietia calcarea3	31	(TC)5	64933	64942
Manglietia calcarea3	32	(AATG)3	65543	65554
Manglietia calcarea3	33	(T)10	70256	70265
Manglietia calcarea3	34	(TTC)4	71521	71532
Manglietia calcarea3	35	(TA)6	71826	71837
Manglietia calcarea3	36	(ATAA)3	73096	73107
Manglietia calcarea3	37	(T)10	74477	74486
Manglietia calcarea3	38	(T)12	75460	75471
Manglietia calcarea3	39	(T)11	84448	84458
Manglietia calcarea3	40	(T)11	84946	84956
Manglietia calcarea3	41	(ACAT)3	87667	87678
Manglietia calcarea3	42	(TATTAG)3	103607	103624
Manglietia calcarea3	43	(A)13	112077	112089
Manglietia calcarea3	44	(AATT)3	115051	115062
Manglietia calcarea3	45	(AAAT)3	117024	117035
Manglietia calcarea3	46	(T)10	124151	124160
Manglietia calcarea3	47	(A)13	126081	126093
Manglietia calcarea3	48	(AATC)3	126395	126406
Manglietia calcarea3	49	(TC)6ttttttttctttcttttccacagatatggattttaccgatcagg(AAT)4	128771	128838
Manglietia calcarea3	50	(CATT)3	130941	130952
Manglietia calcarea3	51	(A)10	132511	132520
Manglietia calcarea3	52	(T)13	136027	136039
Manglietia calcarea3	53	(ACTAAT)3	144491	144508
Manglietia glaucifolia	1	(A)10	211	220
Manglietia glaucifolia	2	(A)11	3939	3949
Manglietia glaucifolia	3	(AAAT)4	4396	4411
Manglietia glaucifolia	4	(T)11	4584	4594
Manglietia glaucifolia	5	(A)11	4752	4762
Manglietia glaucifolia	6	(T)10ggaaggaat(A)12	5377	5407
Manglietia glaucifolia	7	(C)11	7190	7200
Manglietia glaucifolia	8	(T)13	7774	7786
Manglietia glaucifolia	9	(TA)5	9446	9455
Manglietia glaucifolia	10	(T)11aagttggatcaacccttccaattgaatgagtataagtaaaggatccatggatgaagatacaaaaatgtatttctaatcgtaactagatcttcca(T)11	10265	10380
Manglietia glaucifolia	11	(A)14	12766	12779
Manglietia glaucifolia	12	(A)11	13856	13866
Manglietia glaucifolia	13	(A)12	17512	17523
Manglietia glaucifolia	14	(T)12	19705	19716
Manglietia glaucifolia	15	(AT)5	20457	20466
Manglietia glaucifolia	16	(AT)5	21079	21088
Manglietia glaucifolia	17	(T)11	31330	31340
Manglietia glaucifolia	18	(AT)5	33315	33324
Manglietia glaucifolia	19	(TA)6	34977	34988
Manglietia glaucifolia	20	(GAA)4	39318	39329
Manglietia glaucifolia	21	(T)10	45383	45392
Manglietia glaucifolia	22	(TAAA)3	46903	46914
Manglietia glaucifolia	23	(G)10	47811	47820
Manglietia glaucifolia	24	(A)10	50224	50233
Manglietia glaucifolia	25	(T)10	53501	53510
Manglietia glaucifolia	26	(T)10	55664	55673
Manglietia glaucifolia	27	(ATA)4	57880	57891
Manglietia glaucifolia	28	(G)13	58374	58386
Manglietia glaucifolia	29	(TA)5	60212	60221
Manglietia glaucifolia	30	(A)10	64733	64742
Manglietia glaucifolia	31	(TC)5	64935	64944
Manglietia glaucifolia	32	(AATG)3	65545	65556
Manglietia glaucifolia	33	(T)10	70258	70267
Manglietia glaucifolia	34	(T)10	71228	71237
Manglietia glaucifolia	35	(TTC)4	71525	71536
Manglietia glaucifolia	36	(TA)6	71830	71841
Manglietia glaucifolia	37	(ATAA)3	73100	73111
Manglietia glaucifolia	38	(T)11	74481	74491
Manglietia glaucifolia	39	(T)13	75465	75477
Manglietia glaucifolia	40	(T)11	84454	84464
Manglietia glaucifolia	41	(T)11	84952	84962
Manglietia glaucifolia	42	(ACAT)3	87673	87684
Manglietia glaucifolia	43	(TATTAG)3	103613	103630
Manglietia glaucifolia	44	(A)13	112083	112095
Manglietia glaucifolia	45	(AATT)3	115066	115077
Manglietia glaucifolia	46	(AAAT)3	117039	117050
Manglietia glaucifolia	47	(C)13	118550	118562
Manglietia glaucifolia	48	(T)10	124174	124183
Manglietia glaucifolia	49	(A)13	126104	126116
Manglietia glaucifolia	50	(AATC)3	126418	126429
Manglietia glaucifolia	51	(TC)6ttttttttctttcttttccacagatatggattttaccgatcagg(AAT)4	128794	128861
Manglietia glaucifolia	52	(CATT)3	130964	130975
Manglietia glaucifolia	53	(A)10	132534	132543
Manglietia glaucifolia	54	(T)13	136059	136071
Manglietia glaucifolia	55	(ACTAAT)3	144523	144540
Manglietia grandis	1	(A)11	2095	2105
Manglietia grandis	2	(A)10	4308	4317
Manglietia grandis	3	(AAAT)4	4764	4779
Manglietia grandis	4	(T)13	4952	4964
Manglietia grandis	5	(A)11	5764	5774
Manglietia grandis	6	(C)11	7559	7569
Manglietia grandis	7	(T)11	8143	8153
Manglietia grandis	8	(TA)5	9813	9822
Manglietia grandis	9	(T)10	10735	10744
Manglietia grandis	10	(A)14	13130	13143
Manglietia grandis	11	(A)10	14220	14229
Manglietia grandis	12	(T)11(A)12	17867	17889
Manglietia grandis	13	(T)12	20071	20082
Manglietia grandis	14	(AT)5	21445	21454
Manglietia grandis	15	(A)10	30921	30930
Manglietia grandis	16	(T)14	31708	31721
Manglietia grandis	17	(AT)5	33690	33699
Manglietia grandis	18	(TA)6	35345	35356
Manglietia grandis	19	(A)10	39235	39244
Manglietia grandis	20	(GAA)4	39687	39698
Manglietia grandis	21	(TAAA)3(A)10*	47271	47289
Manglietia grandis	22	(A)10	49687	49696
Manglietia grandis	23	(A)11	50554	50564
Manglietia grandis	24	(T)10	53831	53840
Manglietia grandis	25	(T)10	56002	56011
Manglietia grandis	26	(ATA)4	58218	58229
Manglietia grandis	27	(TA)5	60547	60556
Manglietia grandis	28	(TC)5	65276	65285
Manglietia grandis	29	(AATG)3	65886	65897
Manglietia grandis	30	(T)11	70594	70604
Manglietia grandis	31	(T)11	71565	71575
Manglietia grandis	32	(TTC)4	71862	71873
Manglietia grandis	33	(TA)6	72167	72178
Manglietia grandis	34	(T)10	72697	72706
Manglietia grandis	35	(ATAA)3	73438	73449
Manglietia grandis	36	(T)11	75806	75816
Manglietia grandis	37	(T)11	85284	85294
Manglietia grandis	38	(ACAT)3	88001	88012
Manglietia grandis	39	(TATTAG)3	103942	103959
Manglietia grandis	40	(A)12	112416	112427
Manglietia grandis	41	(AATT)3	115383	115394
Manglietia grandis	42	(AAAT)3	117356	117367
Manglietia grandis	43	(C)10	118879	118888
Manglietia grandis	44	(T)10	119966	119975
Manglietia grandis	45	(T)10	124501	124510
Manglietia grandis	46	(A)11	126431	126441
Manglietia grandis	47	(AATC)3	126743	126754
Manglietia grandis	48	(TC)5ttttttttctttcttttccacagatatggattttaccgatcagg(AAT)4	129119	129184
Manglietia grandis	49	(CATT)3	131287	131298
Manglietia grandis	50	(A)10	132857	132866
Manglietia grandis	51	(T)12	136373	136384
Manglietia grandis	52	(ACTAAT)3	144840	144857
Manglietia hookeri	1	(A)10	1727	1736
Manglietia hookeri	2	(A)10	3939	3948
Manglietia hookeri	3	(AAAT)4	4395	4410
Manglietia hookeri	4	(T)12	4583	4594
Manglietia hookeri	5	(A)11	5394	5404
Manglietia hookeri	6	(C)10	7189	7198
Manglietia hookeri	7	(T)12	7772	7783
Manglietia hookeri	8	(TA)5	9443	9452
Manglietia hookeri	9	(T)10aagttggatcaacccttccaattgaatgagtataagtaaaggatccatggatgaagatacaaaaatgtatttctaatcgtaactagatcttcca(T)10	10262	10375
Manglietia hookeri	10	(A)14	12761	12774
Manglietia hookeri	11	(A)10	13851	13860
Manglietia hookeri	12	(A)14	17507	17520
Manglietia hookeri	13	(T)12	19702	19713
Manglietia hookeri	14	(AT)5	21076	21085
Manglietia hookeri	15	(A)10	30552	30561
Manglietia hookeri	16	(T)13	31339	31351
Manglietia hookeri	17	(AT)5	33320	33329
Manglietia hookeri	18	(TA)6	34975	34986
Manglietia hookeri	19	(A)10	38865	38874
Manglietia hookeri	20	(GAA)4	39317	39328
Manglietia hookeri	21	(TAAA)3	46901	46912
Manglietia hookeri	22	(G)13	47808	47820
Manglietia hookeri	23	(A)10	49386	49395
Manglietia hookeri	24	(A)11	50253	50263
Manglietia hookeri	25	(T)10	55695	55704
Manglietia hookeri	26	(ATA)4	57911	57922
Manglietia hookeri	27	(G)10	58406	58415
Manglietia hookeri	28	(TA)5	60241	60250
Manglietia hookeri	29	(TC)5	64970	64979
Manglietia hookeri	30	(AATG)3	65580	65591
Manglietia hookeri	31	(T)11	70288	70298
Manglietia hookeri	32	(C)11(T)11	71250	71271
Manglietia hookeri	33	(TTC)4	71551	71562
Manglietia hookeri	34	(TA)6	71856	71867
Manglietia hookeri	35	(T)10	72386	72395
Manglietia hookeri	36	(ATAA)3	73127	73138
Manglietia hookeri	37	(T)12	75490	75501
Manglietia hookeri	38	(T)12	84969	84980
Manglietia hookeri	39	(ACAT)3	87687	87698
Manglietia hookeri	40	(TATTAG)3	103628	103645
Manglietia hookeri	41	(A)12	112102	112113
Manglietia hookeri	42	(AATT)3	115069	115080
Manglietia hookeri	43	(AAAT)3	117042	117053
Manglietia hookeri	44	(T)10	119652	119661
Manglietia hookeri	45	(T)10	122825	122834
Manglietia hookeri	46	(T)10	124188	124197
Manglietia hookeri	47	(A)10	126118	126127
Manglietia hookeri	48	(AATC)3	126429	126440
Manglietia hookeri	49	(TC)5ttttttttctttcttttccacagatatggattttaccgatcagg(AAT)4	128804	128869
Manglietia hookeri	50	(CATT)3	130972	130983
Manglietia hookeri	51	(A)10	132542	132551
Manglietia hookeri	52	(T)12	136040	136051
Manglietia hookeri	53	(ACTAAT)3	144507	144524
Manglietia insignis	1	(A)11	1726	1736
Manglietia insignis	2	(A)11	3939	3949
Manglietia insignis	3	(AAAT)4	4396	4411
Manglietia insignis	4	(T)12	4584	4595
Manglietia insignis	5	(A)10	4753	4762
Manglietia insignis	6	(A)13	5396	5408
Manglietia insignis	7	(C)10	7193	7202
Manglietia insignis	8	(T)11	7776	7786
Manglietia insignis	9	(TA)5	9445	9454
Manglietia insignis	10	(T)10aagttggatcaacccttccaattgaatgagtataagtaaaggatccatggatgaagatacaaaaatgtatttctaatcgtaactagatcttcca(T)10	10264	10377
Manglietia insignis	11	(A)14	12763	12776
Manglietia insignis	12	(A)10	13853	13862
Manglietia insignis	13	(T)10(A)13	17500	17522
Manglietia insignis	14	(T)12	19704	19715
Manglietia insignis	15	(AT)5	21078	21087
Manglietia insignis	16	(A)10	30568	30577
Manglietia insignis	17	(T)13	31355	31367
Manglietia insignis	18	(AT)5	33336	33345
Manglietia insignis	19	(TA)6	34989	35000
Manglietia insignis	20	(A)10	38879	38888
Manglietia insignis	21	(GAA)4	39331	39342
Manglietia insignis	22	(TAAA)3	46915	46926
Manglietia insignis	23	(G)10	47823	47832
Manglietia insignis	24	(A)10	49398	49407
Manglietia insignis	25	(A)11	50265	50275
Manglietia insignis	26	(T)10	55707	55716
Manglietia insignis	27	(ATA)4	57923	57934
Manglietia insignis	28	(TA)5	60252	60261
Manglietia insignis	29	(TC)5	64987	64996
Manglietia insignis	30	(AATG)3	65597	65608
Manglietia insignis	31	(T)11	70305	70315
Manglietia insignis	32	(C)11(T)10	71272	71292
Manglietia insignis	33	(TTC)4	71579	71590
Manglietia insignis	34	(TA)6	71884	71895
Manglietia insignis	35	(T)10	72414	72423
Manglietia insignis	36	(ATAA)3	73155	73166
Manglietia insignis	37	(T)14	75518	75531
Manglietia insignis	38	(T)10	77958	77967
Manglietia insignis	39	(T)12	85000	85011
Manglietia insignis	40	(ACAT)3	87718	87729
Manglietia insignis	41	(TATTAG)3	103659	103676
Manglietia insignis	42	(A)12	112133	112144
Manglietia insignis	43	(AATT)3	115107	115118
Manglietia insignis	44	(AAAT)3	117080	117091
Manglietia insignis	45	(T)10	124216	124225
Manglietia insignis	46	(A)10	126146	126155
Manglietia insignis	47	(AATC)3	126457	126468
Manglietia insignis	48	(TC)5ttttttttctttcttttccacagatatggattttaccgatcagg(AAT)4	128833	128898
Manglietia insignis	49	(CATT)3	131008	131019
Manglietia insignis	50	(A)10	132578	132587
Manglietia insignis	51	(T)12	136047	136058
Manglietia insignis	52	(ACTAAT)3	144514	144531
Manglietia lucida	1	(A)12	211	222
Manglietia lucida	2	(T)10	1765	1774
Manglietia lucida	3	(A)10	3943	3952
Manglietia lucida	4	(AAAT)4	4399	4414
Manglietia lucida	5	(T)11	4587	4597
Manglietia lucida	6	(T)10ggaaggaat(A)12	5378	5408
Manglietia lucida	7	(C)13	7191	7203
Manglietia lucida	8	(T)13	7777	7789
Manglietia lucida	9	(TA)5	9449	9458
Manglietia lucida	10	(T)11aagttggatcaacccttccaattgaatgagtataagtaaaggatccatggatgaagatacaaaaatgtatttctaatcgtaactagatcttcca(T)11	10268	10383
Manglietia lucida	11	(A)15	12769	12783
Manglietia lucida	12	(A)10	13860	13869
Manglietia lucida	13	(A)12	17521	17532
Manglietia lucida	14	(T)12	19714	19725
Manglietia lucida	15	(AT)5	20466	20475
Manglietia lucida	16	(AT)5	21088	21097
Manglietia lucida	17	(T)11	31339	31349
Manglietia lucida	18	(AT)5	33324	33333
Manglietia lucida	19	(TA)6	34995	35006
Manglietia lucida	20	(A)10	38875	38884
Manglietia lucida	21	(GAA)4	39327	39338
Manglietia lucida	22	(T)10	45392	45401
Manglietia lucida	23	(TAAA)3(A)12*	46912	46932
Manglietia lucida	24	(A)10	50235	50244
Manglietia lucida	25	(T)10	53512	53521
Manglietia lucida	26	(T)10	55675	55684
Manglietia lucida	27	(ATA)4	57891	57902
Manglietia lucida	28	(G)13	58385	58397
Manglietia lucida	29	(TA)5	60223	60232
Manglietia lucida	30	(A)10	64744	64753
Manglietia lucida	31	(TC)5	64946	64955
Manglietia lucida	32	(AATG)3	65556	65567
Manglietia lucida	33	(T)11	70269	70279
Manglietia lucida	34	(C)13(T)13	71231	71256
Manglietia lucida	35	(TTC)4	71544	71555
Manglietia lucida	36	(TA)6	71849	71860
Manglietia lucida	37	(ATAA)3	73119	73130
Manglietia lucida	38	(T)11	74500	74510
Manglietia lucida	39	(T)13	75484	75496
Manglietia lucida	40	(T)11	84473	84483
Manglietia lucida	41	(T)11	84971	84981
Manglietia lucida	42	(ACAT)3	87698	87709
Manglietia lucida	43	(TATTAG)3	103661	103678
Manglietia lucida	44	(A)13	112131	112143
Manglietia lucida	45	(AATT)3	115105	115116
Manglietia lucida	46	(AAAT)3	117078	117089
Manglietia lucida	47	(C)15(A)11	118586	118611
Manglietia lucida	48	(T)10	124214	124223
Manglietia lucida	49	(A)13	126144	126156
Manglietia lucida	50	(AATC)3	126458	126469
Manglietia lucida	51	(TC)6ttttttttctttcttttccacagatatggattttaccgatcagg(AAT)4	128834	128901
Manglietia lucida	52	(CATT)3	131004	131015
Manglietia lucida	53	(A)10	132595	132604
Manglietia lucida	54	(T)13	136111	136123
Manglietia lucida	55	(ACTAAT)3	144575	144592
Manglietia obovalifolia	1	(A)11	1726	1736
Manglietia obovalifolia	2	(A)11	3939	3949
Manglietia obovalifolia	3	(AAAT)4	4396	4411
Manglietia obovalifolia	4	(T)12	4584	4595
Manglietia obovalifolia	5	(A)11	5395	5405
Manglietia obovalifolia	6	(C)10	7190	7199
Manglietia obovalifolia	7	(T)13	7767	7779
Manglietia obovalifolia	8	(TA)5	9439	9448
Manglietia obovalifolia	9	(T)10aagttggatcaacccttccaattgaatgagtataagtaaaggatccatggatgaagatacaaaaatgtatttctaatcgtaactagatcttcca(T)10	10258	10371
Manglietia obovalifolia	10	(A)14	12757	12770
Manglietia obovalifolia	11	(A)10	13846	13855
Manglietia obovalifolia	12	(T)10(A)13	17493	17515
Manglietia obovalifolia	13	(T)12	19697	19708
Manglietia obovalifolia	14	(AT)5	21071	21080
Manglietia obovalifolia	15	(A)10	30549	30558
Manglietia obovalifolia	16	(T)13	31337	31349
Manglietia obovalifolia	17	(AT)5	33318	33327
Manglietia obovalifolia	18	(TA)6	34972	34983
Manglietia obovalifolia	19	(A)11	38861	38871
Manglietia obovalifolia	20	(GAA)4	39314	39325
Manglietia obovalifolia	21	(T)10	45379	45388
Manglietia obovalifolia	22	(TAAA)3	46899	46910
Manglietia obovalifolia	23	(G)12	47806	47817
Manglietia obovalifolia	24	(A)10	49383	49392
Manglietia obovalifolia	25	(A)11	50250	50260
Manglietia obovalifolia	26	(T)10	55692	55701
Manglietia obovalifolia	27	(ATA)4	57908	57919
Manglietia obovalifolia	28	(G)10	58403	58412
Manglietia obovalifolia	29	(TA)5	60238	60247
Manglietia obovalifolia	30	(TC)5	64967	64976
Manglietia obovalifolia	31	(AATG)3	65577	65588
Manglietia obovalifolia	32	(T)12	70285	70296
Manglietia obovalifolia	33	(C)13	71248	71260
Manglietia obovalifolia	34	(TTC)4	71555	71566
Manglietia obovalifolia	35	(TA)6	71860	71871
Manglietia obovalifolia	36	(T)10	72390	72399
Manglietia obovalifolia	37	(ATAA)3	73131	73142
Manglietia obovalifolia	38	(T)12	75494	75505
Manglietia obovalifolia	39	(T)12	84973	84984
Manglietia obovalifolia	40	(ACAT)3	87692	87703
Manglietia obovalifolia	41	(TATTAG)3	103633	103650
Manglietia obovalifolia	42	(A)12	112107	112118
Manglietia obovalifolia	43	(AATT)3	115073	115084
Manglietia obovalifolia	44	(AAAT)3	117046	117057
Manglietia obovalifolia	45	(C)14	118569	118582
Manglietia obovalifolia	46	(T)10	119660	119669
Manglietia obovalifolia	47	(T)11	122833	122843
Manglietia obovalifolia	48	(T)10	124197	124206
Manglietia obovalifolia	49	(A)11	126127	126137
Manglietia obovalifolia	50	(AATC)3	126439	126450
Manglietia obovalifolia	51	(TC)5ttttttttctttcttttccacagatatggattttaccgatcagg(AAT)4	128815	128880
Manglietia obovalifolia	52	(CATT)3	130983	130994
Manglietia obovalifolia	53	(A)10	132553	132562
Manglietia obovalifolia	54	(T)12	136069	136080
Manglietia obovalifolia	55	(ACTAAT)3	144536	144553
Manglietia patungensis	1	(A)10	211	220
Manglietia patungensis	2	(A)10	3939	3948
Manglietia patungensis	3	(AAAT)4	4395	4410
Manglietia patungensis	4	(T)10	4583	4592
Manglietia patungensis	5	(A)10	4750	4759
Manglietia patungensis	6	(T)10ggaaggaat(A)11	5374	5403
Manglietia patungensis	7	(C)10	7186	7195
Manglietia patungensis	8	(T)14	7769	7782
Manglietia patungensis	9	(TA)5	9442	9451
Manglietia patungensis	10	(T)10aagttggatcaacccttccaattgaatgagtataagtaaaggatccatggatgaagatacaaaaatgtatttctaatcgtaactagatcttcca(T)10	10261	10374
Manglietia patungensis	11	(A)14	12760	12773
Manglietia patungensis	12	(A)10	13850	13859
Manglietia patungensis	13	(A)11	17505	17515
Manglietia patungensis	14	(T)12	19697	19708
Manglietia patungensis	15	(AT)5	20449	20458
Manglietia patungensis	16	(AT)5	21071	21080
Manglietia patungensis	17	(T)12	31322	31333
Manglietia patungensis	18	(AT)5	33308	33317
Manglietia patungensis	19	(TA)6	34979	34990
Manglietia patungensis	20	(GAA)4	39320	39331
Manglietia patungensis	21	(T)10	45385	45394
Manglietia patungensis	22	(TAAA)3(A)12*	46905	46925
Manglietia patungensis	23	(G)10	47816	47825
Manglietia patungensis	24	(T)10	53505	53514
Manglietia patungensis	25	(T)10	55668	55677
Manglietia patungensis	26	(T)10	55884	55893
Manglietia patungensis	27	(ATA)4	57885	57896
Manglietia patungensis	28	(G)11	58379	58389
Manglietia patungensis	29	(TA)5	60215	60224
Manglietia patungensis	30	(A)11	64736	64746
Manglietia patungensis	31	(TC)5	64939	64948
Manglietia patungensis	32	(AATG)3	65549	65560
Manglietia patungensis	33	(T)11	70262	70272
Manglietia patungensis	34	(T)10	71233	71242
Manglietia patungensis	35	(TTC)4	71530	71541
Manglietia patungensis	36	(TA)6	71835	71846
Manglietia patungensis	37	(ATAA)3	73105	73116
Manglietia patungensis	38	(T)13	74486	74498
Manglietia patungensis	39	(T)15	75472	75486
Manglietia patungensis	40	(T)10	84463	84472
Manglietia patungensis	41	(T)11	84960	84970
Manglietia patungensis	42	(ACAT)3	87681	87692
Manglietia patungensis	43	(TATTAG)3	103621	103638
Manglietia patungensis	44	(A)13	112091	112103
Manglietia patungensis	45	(AATT)3	115103	115114
Manglietia patungensis	46	(AAAT)3	117076	117087
Manglietia patungensis	47	(C)14	118586	118599
Manglietia patungensis	48	(T)10	124211	124220
Manglietia patungensis	49	(A)11	126141	126151
Manglietia patungensis	50	(AATC)3	126453	126464
Manglietia patungensis	51	(TC)6ttttttttctttcttttccacagatatggattttaccgatcagg(AAT)4	128829	128896
Manglietia patungensis	52	(CATT)3	130999	131010
Manglietia patungensis	53	(A)10	132569	132578
Manglietia patungensis	54	(T)13	136139	136151
Manglietia patungensis	55	(ACTAAT)3	144603	144620
Manglietia ventii	1	(A)10	1731	1740
Manglietia ventii	2	(A)10	3943	3952
Manglietia ventii	3	(AAAT)4	4399	4414
Manglietia ventii	4	(T)12	4587	4598
Manglietia ventii	5	(A)11	5398	5408
Manglietia ventii	6	(C)10	7194	7203
Manglietia ventii	7	(T)11	7777	7787
Manglietia ventii	8	(TA)5	9447	9456
Manglietia ventii	9	(T)10	10266	10275
Manglietia ventii	10	(A)14	12764	12777
Manglietia ventii	11	(A)10	13854	13863
Manglietia ventii	12	(T)12(A)11	17501	17523
Manglietia ventii	13	(T)12	19705	19716
Manglietia ventii	14	(AT)5	21079	21088
Manglietia ventii	15	(A)10	30555	30564
Manglietia ventii	16	(T)15	31342	31356
Manglietia ventii	17	(AT)5	33330	33339
Manglietia ventii	18	(TA)6	34984	34995
Manglietia ventii	19	(A)10	38874	38883
Manglietia ventii	20	(GAA)4	39326	39337
Manglietia ventii	21	(TAAA)3	46910	46921
Manglietia ventii	22	(A)10	49286	49295
Manglietia ventii	23	(A)11	50153	50163
Manglietia ventii	24	(T)10	55595	55604
Manglietia ventii	25	(ATA)4	57811	57822
Manglietia ventii	26	(G)10	58306	58315
Manglietia ventii	27	(TA)5	60141	60150
Manglietia ventii	28	(TC)5	64870	64879
Manglietia ventii	29	(AATG)3	65480	65491
Manglietia ventii	30	(T)11	70188	70198
Manglietia ventii	31	(C)12	71150	71161
Manglietia ventii	32	(TTC)4	71457	71468
Manglietia ventii	33	(TA)6	71762	71773
Manglietia ventii	34	(T)10	72292	72301
Manglietia ventii	35	(ATAA)3	73033	73044
Manglietia ventii	36	(T)10	75396	75405
Manglietia ventii	37	(T)10	84873	84882
Manglietia ventii	38	(ACAT)3	87582	87593
Manglietia ventii	39	(TATTAG)3	103523	103540
Manglietia ventii	40	(A)12	111997	112008
Manglietia ventii	41	(AATT)3	114963	114974
Manglietia ventii	42	(AAAT)3	116936	116947
Manglietia ventii	43	(T)10	119545	119554
Manglietia ventii	44	(T)10	124080	124089
Manglietia ventii	45	(A)10	126010	126019
Manglietia ventii	46	(AATC)3	126321	126332
Manglietia ventii	47	(TC)5ttttttttctttcttttccacagatatggattttaccgatcagg(AAT)4	128697	128762
Manglietia ventii	48	(CATT)3	130865	130876
Manglietia ventii	49	(A)10	132435	132444
Manglietia ventii	50	(T)12	135951	135962
Manglietia ventii	51	(ACTAAT)3	144418	144435
Manglietia zhengyiana	1	(A)10	211	220
Manglietia zhengyiana	2	(AAAT)4	4394	4409
Manglietia zhengyiana	3	(T)12	4582	4593
Manglietia zhengyiana	4	(A)10	4751	4760
Manglietia zhengyiana	5	(T)10ggaaggaat(A)11	5375	5404
Manglietia zhengyiana	6	(C)11	7187	7197
Manglietia zhengyiana	7	(T)12	7771	7782
Manglietia zhengyiana	8	(TA)5	9442	9451
Manglietia zhengyiana	9	(T)11aagttggatcaacccttccaattgaatgagtataagtaaaggatccatggatgaagatacaaaaatgtatttctaatcgtaactagatcttcca(T)11	10261	10376
Manglietia zhengyiana	10	(A)15	12762	12776
Manglietia zhengyiana	11	(A)10	13853	13862
Manglietia zhengyiana	12	(A)11	17508	17518
Manglietia zhengyiana	13	(T)12	19700	19711
Manglietia zhengyiana	14	(AT)5	20452	20461
Manglietia zhengyiana	15	(AT)5	21074	21083
Manglietia zhengyiana	16	(T)11	31325	31335
Manglietia zhengyiana	17	(AT)5	33309	33318
Manglietia zhengyiana	18	(TA)6	34980	34991
Manglietia zhengyiana	19	(GAA)4	39321	39332
Manglietia zhengyiana	20	(T)10	45386	45395
Manglietia zhengyiana	21	(TAAA)3(A)12*	46906	46926
Manglietia zhengyiana	22	(G)10	47817	47826
Manglietia zhengyiana	23	(A)11	50224	50234
Manglietia zhengyiana	24	(T)10	53496	53505
Manglietia zhengyiana	25	(T)10	55659	55668
Manglietia zhengyiana	26	(T)10	55875	55884
Manglietia zhengyiana	27	(ATA)4	57876	57887
Manglietia zhengyiana	28	(G)13	58370	58382
Manglietia zhengyiana	29	(TA)5	60208	60217
Manglietia zhengyiana	30	(A)11	64729	64739
Manglietia zhengyiana	31	(TC)5	64932	64941
Manglietia zhengyiana	32	(AATG)3	65542	65553
Manglietia zhengyiana	33	(T)10	70255	70264
Manglietia zhengyiana	34	(C)10(T)10	71216	71235
Manglietia zhengyiana	35	(TTC)4	71523	71534
Manglietia zhengyiana	36	(TA)6	71828	71839
Manglietia zhengyiana	37	(ATAA)3	73098	73109
Manglietia zhengyiana	38	(T)12	74479	74490
Manglietia zhengyiana	39	(T)12	75464	75475
Manglietia zhengyiana	40	(T)10	77902	77911
Manglietia zhengyiana	41	(T)12	84453	84464
Manglietia zhengyiana	42	(T)11	84952	84962
Manglietia zhengyiana	43	(ACAT)3	87673	87684
Manglietia zhengyiana	44	(TATTAG)3	103613	103630
Manglietia zhengyiana	45	(A)13	112083	112095
Manglietia zhengyiana	46	(AATT)3	115057	115068
Manglietia zhengyiana	47	(AAAT)3	117030	117041
Manglietia zhengyiana	48	(C)10	118541	118550
Manglietia zhengyiana	49	(T)11	124162	124172
Manglietia zhengyiana	50	(A)14	126093	126106
Manglietia zhengyiana	51	(AATC)3	126408	126419
Manglietia zhengyiana	52	(TC)6ttttttttctttcttttccacagatatggattttaccgatcagg(AAT)4	128784	128851
Manglietia zhengyiana	53	(CATT)3	130954	130965
Manglietia zhengyiana	54	(A)10	132524	132533
Manglietia zhengyiana	55	(T)13	136058	136070
Manglietia zhengyiana	56	(ACTAAT)3	144522	144539
Manglietia calcarea2	1	(A)12	316	327
Manglietia calcarea2	2	(A)10	4047	4056
Manglietia calcarea2	3	(AAAT)4	4503	4518
Manglietia calcarea2	4	(T)12	4691	4702
Manglietia calcarea2	5	(A)10	4860	4869
Manglietia calcarea2	6	(T)10ggaaggaat(A)12	5484	5514
Manglietia calcarea2	7	(C)12	7282	7293
Manglietia calcarea2	8	(T)12	7867	7878
Manglietia calcarea2	9	(TA)5	9538	9547
Manglietia calcarea2	10	(T)11aagttggatcaacccttccaattgaatgagtataagtaaaggatccatggatgaagatacaaaaatgtatttctaatcgtaactagatcttcca(T)11	10357	10472
Manglietia calcarea2	11	(A)15	12858	12872
Manglietia calcarea2	12	(A)10	13949	13958
Manglietia calcarea2	13	(A)12	17604	17615
Manglietia calcarea2	14	(T)12	19797	19808
Manglietia calcarea2	15	(AT)5	20549	20558
Manglietia calcarea2	16	(AT)5	21171	21180
Manglietia calcarea2	17	(T)11	31422	31432
Manglietia calcarea2	18	(AT)5	33407	33416
Manglietia calcarea2	19	(TA)6	35076	35087
Manglietia calcarea2	20	(GAA)4	39417	39428
Manglietia calcarea2	21	(T)10	45482	45491
Manglietia calcarea2	22	(TAAA)3(A)11*	47002	47021
Manglietia calcarea2	23	(G)10	47912	47921
Manglietia calcarea2	24	(A)10	50326	50335
Manglietia calcarea2	25	(T)10	53603	53612
Manglietia calcarea2	26	(T)10	55766	55775
Manglietia calcarea2	27	(ATA)4	57982	57993
Manglietia calcarea2	28	(G)13	58476	58488
Manglietia calcarea2	29	(TA)5	60314	60323
Manglietia calcarea2	30	(A)11	64835	64845
Manglietia calcarea2	31	(TC)5	65038	65047
Manglietia calcarea2	32	(AATG)3	65648	65659
Manglietia calcarea2	33	(T)10	70361	70370
Manglietia calcarea2	34	(TTC)4	71626	71637
Manglietia calcarea2	35	(TA)6	71931	71942
Manglietia calcarea2	36	(ATAA)3	73201	73212
Manglietia calcarea2	37	(T)10	74582	74591
Manglietia calcarea2	38	(T)12	75565	75576
Manglietia calcarea2	39	(T)11	84553	84563
Manglietia calcarea2	40	(T)11	85051	85061
Manglietia calcarea2	41	(ACAT)3	87772	87783
Manglietia calcarea2	42	(TATTAG)3	103817	103834
Manglietia calcarea2	43	(A)13	110601	110613
Manglietia calcarea2	44	(AATT)3	113680	113691
Manglietia calcarea2	45	(AAAT)3	115653	115664
Manglietia calcarea2	46	(T)10	122780	122789
Manglietia calcarea2	47	(A)13	124710	124722
Manglietia calcarea2	48	(AATC)3	125024	125035
Manglietia calcarea2	49	(TC)6ttttttttctttcttttccacagatatggattttaccgatcagg(AAT)4	127400	127467
Manglietia calcarea2	50	(CATT)3	129570	129581
Manglietia calcarea2	51	(A)10	131140	131149
Manglietia calcarea2	52	(T)13	134779	134791
Manglietia calcarea2	53	(ACTAAT)3	141557	141574
Manglietia calcarea1	1	(A)12	316	327
Manglietia calcarea1	2	(A)10	4047	4056
Manglietia calcarea1	3	(AAAT)4	4503	4518
Manglietia calcarea1	4	(T)12	4691	4702
Manglietia calcarea1	5	(A)10	4860	4869
Manglietia calcarea1	6	(T)10ggaaggaat(A)12	5484	5514
Manglietia calcarea1	7	(C)12	7282	7293
Manglietia calcarea1	8	(T)12	7867	7878
Manglietia calcarea1	9	(TA)5	9538	9547
Manglietia calcarea1	10	(T)11aagttggatcaacccttccaattgaatgagtataagtaaaggatccatggatgaagatacaaaaatgtatttctaatcgtaactagatcttcca(T)11	10357	10472
Manglietia calcarea1	11	(A)15	12858	12872
Manglietia calcarea1	12	(A)10	13949	13958
Manglietia calcarea1	13	(A)12	17604	17615
Manglietia calcarea1	14	(T)12	19797	19808
Manglietia calcarea1	15	(AT)5	20549	20558
Manglietia calcarea1	16	(AT)5	21171	21180
Manglietia calcarea1	17	(T)11	31422	31432
Manglietia calcarea1	18	(AT)5	33407	33416
Manglietia calcarea1	19	(TA)6	35076	35087
Manglietia calcarea1	20	(GAA)4	39417	39428
Manglietia calcarea1	21	(T)11	45482	45492
Manglietia calcarea1	22	(TAAA)3(A)11*	47003	47022
Manglietia calcarea1	23	(G)10	47913	47922
Manglietia calcarea1	24	(A)10	50327	50336
Manglietia calcarea1	25	(T)10	53604	53613
Manglietia calcarea1	26	(T)10	55767	55776
Manglietia calcarea1	27	(ATA)4	57983	57994
Manglietia calcarea1	28	(G)12	58477	58488
Manglietia calcarea1	29	(TA)5	60314	60323
Manglietia calcarea1	30	(A)11	64835	64845
Manglietia calcarea1	31	(TC)5	65038	65047
Manglietia calcarea1	32	(AATG)3	65648	65659
Manglietia calcarea1	33	(T)10	70361	70370
Manglietia calcarea1	34	(TTC)4	71626	71637
Manglietia calcarea1	35	(TA)6	71931	71942
Manglietia calcarea1	36	(ATAA)3	73201	73212
Manglietia calcarea1	37	(T)10	74582	74591
Manglietia calcarea1	38	(T)12	75565	75576
Manglietia calcarea1	39	(T)10	84553	84562
Manglietia calcarea1	40	(T)11	85050	85060
Manglietia calcarea1	41	(ACAT)3	87771	87782
Manglietia calcarea1	42	(TATTAG)3	103816	103833
Manglietia calcarea1	43	(A)13	112286	112298
Manglietia calcarea1	44	(AATT)3	115365	115376
Manglietia calcarea1	45	(AAAT)3	117338	117349
Manglietia calcarea1	46	(T)10	124465	124474
Manglietia calcarea1	47	(A)13	126395	126407
Manglietia calcarea1	48	(AATC)3	126709	126720
Manglietia calcarea1	49	(TC)6ttttttttctttcttttccacagatatggattttaccgatcagg(AAT)4	129085	129152
Manglietia calcarea1	50	(CATT)3	131255	131266
Manglietia calcarea1	51	(A)10	132825	132834
Manglietia calcarea1	52	(T)13	136446	136458
Manglietia calcarea1	53	(ACTAAT)3	144910	144927
Manglietia glauca	1	(A)11	316	326
Manglietia glauca	2	(A)10	4045	4054
Manglietia glauca	3	(AAAT)4	4501	4516
Manglietia glauca	4	(T)10	4689	4698
Manglietia glauca	5	(T)10ggaaggaat(A)11	5485	5514
Manglietia glauca	6	(C)10	7297	7306
Manglietia glauca	7	(T)13	7880	7892
Manglietia glauca	8	(TA)5	9552	9561
Manglietia glauca	9	(T)10aagttggatcaacccttccaattgaatgagtataagtaaaggatccatggatgaagatacaaaaatgtatttctaatcgtaactagatcttcca(T)11	10371	10485
Manglietia glauca	10	(A)16	12871	12886
Manglietia glauca	11	(A)10	13963	13972
Manglietia glauca	12	(A)13	17607	17619
Manglietia glauca	13	(T)12	19801	19812
Manglietia glauca	14	(AT)5	20553	20562
Manglietia glauca	15	(AT)5	21175	21184
Manglietia glauca	16	(T)10	31426	31435
Manglietia glauca	17	(AT)5	33405	33414
Manglietia glauca	18	(TA)6	35076	35087
Manglietia glauca	19	(GAA)4	39417	39428
Manglietia glauca	20	(TAAA)3(A)11*	47001	47020
Manglietia glauca	21	(A)10	50323	50332
Manglietia glauca	22	(T)10	53600	53609
Manglietia glauca	23	(ATA)4	57978	57989
Manglietia glauca	24	(G)11	58472	58482
Manglietia glauca	25	(TA)5	60308	60317
Manglietia glauca	26	(A)10	64830	64839
Manglietia glauca	27	(TC)5	65032	65041
Manglietia glauca	28	(AATG)3	65642	65653
Manglietia glauca	29	(T)11	70355	70365
Manglietia glauca	30	(C)10(T)11	71317	71337
Manglietia glauca	31	(TTC)4	71625	71636
Manglietia glauca	32	(TA)6	71930	71941
Manglietia glauca	33	(ATAA)3	73200	73211
Manglietia glauca	34	(T)10	74581	74590
Manglietia glauca	35	(T)12	75564	75575
Manglietia glauca	36	(T)12	84552	84563
Manglietia glauca	37	(T)11	85051	85061
Manglietia glauca	38	(ACAT)3	87772	87783
Manglietia glauca	39	(TATTAG)3	103817	103834
Manglietia glauca	40	(A)13	112287	112299
Manglietia glauca	41	(AATT)3	115366	115377
Manglietia glauca	42	(AAAT)3	117339	117350
Manglietia glauca	43	(C)15(A)10	118850	118874
Manglietia glauca	44	(T)10	123115	123124
Manglietia glauca	45	(T)10	124478	124487
Manglietia glauca	46	(A)13	126408	126420
Manglietia glauca	47	(AATC)3	126722	126733
Manglietia glauca	48	(TC)6ttttttttctttcttttccacagatatggattttaccgatcagg(AAT)4	129098	129165
Manglietia glauca	49	(CATT)3	131268	131279
Manglietia glauca	50	(A)10	132838	132847
Manglietia glauca	51	(T)13	136459	136471
Manglietia glauca	52	(ACTAAT)3	144923	144940
Manglietia kwangtungensis	1	(A)11	4043	4053
Manglietia kwangtungensis	2	(AAAT)4	4500	4515
Manglietia kwangtungensis	3	(T)12	4688	4699
Manglietia kwangtungensis	4	(A)11	4857	4867
Manglietia kwangtungensis	5	(T)10ggaaggaat(A)12	5482	5512
Manglietia kwangtungensis	6	(C)10	7295	7304
Manglietia kwangtungensis	7	(T)13	7878	7890
Manglietia kwangtungensis	8	(TA)5	9550	9559
Manglietia kwangtungensis	9	(T)12aagttggatcaacccttccaattgaatgagtataagtaaaggatccatggatgaagatacaaaaatgtatttctaatcgtaactagatcttcca(T)11	10369	10485
Manglietia kwangtungensis	10	(A)14	12871	12884
Manglietia kwangtungensis	11	(A)11	13960	13970
Manglietia kwangtungensis	12	(A)12	17616	17627
Manglietia kwangtungensis	13	(T)12	19809	19820
Manglietia kwangtungensis	14	(AT)5	20561	20570
Manglietia kwangtungensis	15	(AT)5	21183	21192
Manglietia kwangtungensis	16	(T)11	31434	31444
Manglietia kwangtungensis	17	(AT)5	33419	33428
Manglietia kwangtungensis	18	(TA)6	35090	35101
Manglietia kwangtungensis	19	(GAA)4	39431	39442
Manglietia kwangtungensis	20	(T)10	45496	45505
Manglietia kwangtungensis	21	(TAAA)3(A)10*	47016	47034
Manglietia kwangtungensis	22	(G)10	47925	47934
Manglietia kwangtungensis	23	(T)10	53614	53623
Manglietia kwangtungensis	24	(T)10	55777	55786
Manglietia kwangtungensis	25	(ATA)4	57993	58004
Manglietia kwangtungensis	26	(G)12	58487	58498
Manglietia kwangtungensis	27	(TA)5	60324	60333
Manglietia kwangtungensis	28	(A)11	64851	64861
Manglietia kwangtungensis	29	(TC)5	65054	65063
Manglietia kwangtungensis	30	(AATG)3	65664	65675
Manglietia kwangtungensis	31	(T)11	70377	70387
Manglietia kwangtungensis	32	(T)10	71348	71357
Manglietia kwangtungensis	33	(TTC)4	71645	71656
Manglietia kwangtungensis	34	(TA)6	71950	71961
Manglietia kwangtungensis	35	(ATAA)3	73220	73231
Manglietia kwangtungensis	36	(T)12	74601	74612
Manglietia kwangtungensis	37	(T)10	75586	75595
Manglietia kwangtungensis	38	(T)13	84572	84584
Manglietia kwangtungensis	39	(T)11	85072	85082
Manglietia kwangtungensis	40	(ACAT)3	87793	87804
Manglietia kwangtungensis	41	(TATTAG)3	103838	103855
Manglietia kwangtungensis	42	(A)13	112308	112320
Manglietia kwangtungensis	43	(AATT)3	115387	115398
Manglietia kwangtungensis	44	(AAAT)3	117360	117371
Manglietia kwangtungensis	45	(C)10	118871	118880
Manglietia kwangtungensis	46	(T)10	123130	123139
Manglietia kwangtungensis	47	(T)11	124493	124503
Manglietia kwangtungensis	48	(A)13	126424	126436
Manglietia kwangtungensis	49	(AATC)3	126738	126749
Manglietia kwangtungensis	50	(TC)6ttttttttctttcttttccacagatatggattttaccgatcagg(AAT)4	129114	129181
Manglietia kwangtungensis	51	(CATT)3	131284	131295
Manglietia kwangtungensis	52	(A)10	132854	132863
Manglietia kwangtungensis	53	(T)13	136493	136505
Manglietia kwangtungensis	54	(ACTAAT)3	144957	144974
Manglietia aromatica2	1	(A)12	211	222
Manglietia aromatica2	2	(A)10	3942	3951
Manglietia aromatica2	3	(AAAT)4	4398	4413
Manglietia aromatica2	4	(T)12	4586	4597
Manglietia aromatica2	5	(A)10	4755	4764
Manglietia aromatica2	6	(T)10ggaaggaat(A)12	5379	5409
Manglietia aromatica2	7	(C)12	7177	7188
Manglietia aromatica2	8	(T)12	7762	7773
Manglietia aromatica2	9	(TA)5	9433	9442
Manglietia aromatica2	10	(T)11aagttggatcaacccttccaattgaatgagtataagtaaaggatccatggatgaagatacaaaaatgtatttctaatcgtaactagatcttcca(T)11	10252	10367
Manglietia aromatica2	11	(A)15	12753	12767
Manglietia aromatica2	12	(A)10	13844	13853
Manglietia aromatica2	13	(A)12	17499	17510
Manglietia aromatica2	14	(T)12	19692	19703
Manglietia aromatica2	15	(AT)5	20444	20453
Manglietia aromatica2	16	(AT)5	21066	21075
Manglietia aromatica2	17	(T)11	31317	31327
Manglietia aromatica2	18	(AT)5	33301	33310
Manglietia aromatica2	19	(TA)6	34970	34981
Manglietia aromatica2	20	(GAA)4	39311	39322
Manglietia aromatica2	21	(T)10	45376	45385
Manglietia aromatica2	22	(TAAA)3(A)11*	46896	46915
Manglietia aromatica2	23	(G)10	47806	47815
Manglietia aromatica2	24	(A)10	50220	50229
Manglietia aromatica2	25	(T)10	53497	53506
Manglietia aromatica2	26	(T)10	55660	55669
Manglietia aromatica2	27	(ATA)4	57876	57887
Manglietia aromatica2	28	(G)12	58370	58381
Manglietia aromatica2	29	(TA)5	60207	60216
Manglietia aromatica2	30	(A)11	64728	64738
Manglietia aromatica2	31	(TC)5	64931	64940
Manglietia aromatica2	32	(AATG)3	65541	65552
Manglietia aromatica2	33	(T)10	70254	70263
Manglietia aromatica2	34	(TTC)4	71519	71530
Manglietia aromatica2	35	(TA)6	71824	71835
Manglietia aromatica2	36	(ATAA)3	73094	73105
Manglietia aromatica2	37	(T)10	74475	74484
Manglietia aromatica2	38	(T)13	75458	75470
Manglietia aromatica2	39	(T)11	84447	84457
Manglietia aromatica2	40	(T)11	84945	84955
Manglietia aromatica2	41	(ACAT)3	87666	87677
Manglietia aromatica2	42	(TATTAG)3	103606	103623
Manglietia aromatica2	43	(A)13	112076	112088
Manglietia aromatica2	44	(AATT)3	115050	115061
Manglietia aromatica2	45	(AAAT)3	117023	117034
Manglietia aromatica2	46	(T)10	124150	124159
Manglietia aromatica2	47	(A)13	126080	126092
Manglietia aromatica2	48	(AATC)3	126394	126405
Manglietia aromatica2	49	(TC)6ttttttttctttcttttccacagatatggattttaccgatcagg(AAT)4	128770	128837
Manglietia aromatica2	50	(CATT)3	130940	130951
Manglietia aromatica2	51	(A)10	132510	132519
Manglietia aromatica2	52	(T)13	136062	136074
Manglietia aromatica2	53	(ACTAAT)3	144526	144543
Manglietia conifera	1	(A)12	211	222
Manglietia conifera	2	(A)10	3942	3951
Manglietia conifera	3	(AAAT)4	4398	4413
Manglietia conifera	4	(T)12	4586	4597
Manglietia conifera	5	(A)10	4755	4764
Manglietia conifera	6	(T)10ggaaggaat(A)12	5379	5409
Manglietia conifera	7	(C)12	7177	7188
Manglietia conifera	8	(T)12	7762	7773
Manglietia conifera	9	(TA)5	9433	9442
Manglietia conifera	10	(T)11aagttggatcaacccttccaattgaatgagtataagtaaaggatccatggatgaagatacaaaaatgtatttctaatcgtaactagatcttcca(T)11	10252	10367
Manglietia conifera	11	(A)15	12753	12767
Manglietia conifera	12	(A)10	13844	13853
Manglietia conifera	13	(A)12	17499	17510
Manglietia conifera	14	(T)12	19692	19703
Manglietia conifera	15	(AT)5	20444	20453
Manglietia conifera	16	(AT)5	21066	21075
Manglietia conifera	17	(T)11	31317	31327
Manglietia conifera	18	(AT)5	33302	33311
Manglietia conifera	19	(TA)6	34971	34982
Manglietia conifera	20	(GAA)4	39312	39323
Manglietia conifera	21	(T)11	45377	45387
Manglietia conifera	22	(TAAA)3(A)11*	46898	46917
Manglietia conifera	23	(G)10	47808	47817
Manglietia conifera	24	(A)10	50222	50231
Manglietia conifera	25	(T)10	53499	53508
Manglietia conifera	26	(T)10	55662	55671
Manglietia conifera	27	(ATA)4	57878	57889
Manglietia conifera	28	(G)12	58372	58383
Manglietia conifera	29	(TA)5	60209	60218
Manglietia conifera	30	(A)11	64730	64740
Manglietia conifera	31	(TC)5	64933	64942
Manglietia conifera	32	(AATG)3	65543	65554
Manglietia conifera	33	(T)10	70256	70265
Manglietia conifera	34	(TTC)4	71521	71532
Manglietia conifera	35	(TA)6	71826	71837
Manglietia conifera	36	(ATAA)3	73096	73107
Manglietia conifera	37	(T)10	74477	74486
Manglietia conifera	38	(T)12	75460	75471
Manglietia conifera	39	(T)11	84448	84458
Manglietia conifera	40	(T)11	84946	84956
Manglietia conifera	41	(ACAT)3	87667	87678
Manglietia conifera	42	(TATTAG)3	103607	103624
Manglietia conifera	43	(A)13	112077	112089
Manglietia conifera	44	(AATT)3	115051	115062
Manglietia conifera	45	(AAAT)3	117024	117035
Manglietia conifera	46	(T)10	124151	124160
Manglietia conifera	47	(A)13	126081	126093
Manglietia conifera	48	(AATC)3	126395	126406
Manglietia conifera	49	(TC)6ttttttttctttcttttccacagatatggattttaccgatcagg(AAT)4	128771	128838
Manglietia conifera	50	(CATT)3	130941	130952
Manglietia conifera	51	(A)10	132511	132520
Manglietia conifera	52	(T)13	135973	135985
Manglietia conifera	53	(ACTAAT)3	144437	144454
Manglietia crassipes	1	(A)10	1731	1740
Manglietia crassipes	2	(A)10	3943	3952
Manglietia crassipes	3	(AAAT)4	4399	4414
Manglietia crassipes	4	(T)12	4587	4598
Manglietia crassipes	5	(A)11	5398	5408
Manglietia crassipes	6	(C)10	7194	7203
Manglietia crassipes	7	(T)11	7777	7787
Manglietia crassipes	8	(TA)5	9447	9456
Manglietia crassipes	9	(T)10	10266	10275
Manglietia crassipes	10	(A)14	12764	12777
Manglietia crassipes	11	(A)10	13854	13863
Manglietia crassipes	12	(T)12(A)11	17501	17523
Manglietia crassipes	13	(T)12	19705	19716
Manglietia crassipes	14	(AT)5	21079	21088
Manglietia crassipes	15	(A)10	30555	30564
Manglietia crassipes	16	(T)15	31342	31356
Manglietia crassipes	17	(AT)5	33330	33339
Manglietia crassipes	18	(TA)6	34984	34995
Manglietia crassipes	19	(A)10	38874	38883
Manglietia crassipes	20	(GAA)4	39326	39337
Manglietia crassipes	21	(TAAA)3	46910	46921
Manglietia crassipes	22	(A)10	49237	49246
Manglietia crassipes	23	(A)11	50104	50114
Manglietia crassipes	24	(T)10	55546	55555
Manglietia crassipes	25	(ATA)4	57762	57773
Manglietia crassipes	26	(G)10	58257	58266
Manglietia crassipes	27	(TA)5	60092	60101
Manglietia crassipes	28	(TC)5	64821	64830
Manglietia crassipes	29	(AATG)3	65431	65442
Manglietia crassipes	30	(T)11	70139	70149
Manglietia crassipes	31	(C)12	71101	71112
Manglietia crassipes	32	(TTC)4	71408	71419
Manglietia crassipes	33	(TA)6	71713	71724
Manglietia crassipes	34	(T)10	72243	72252
Manglietia crassipes	35	(ATAA)3	72984	72995
Manglietia crassipes	36	(T)10	75347	75356
Manglietia crassipes	37	(T)10	84824	84833
Manglietia crassipes	38	(ACAT)3	87533	87544
Manglietia crassipes	39	(TATTAG)3	103474	103491
Manglietia crassipes	40	(A)12	111948	111959
Manglietia crassipes	41	(AATT)3	114914	114925
Manglietia crassipes	42	(AAAT)3	116887	116898
Manglietia crassipes	43	(T)10	119496	119505
Manglietia crassipes	44	(T)10	124031	124040
Manglietia crassipes	45	(A)10	125961	125970
Manglietia crassipes	46	(AATC)3	126272	126283
Manglietia crassipes	47	(TC)5ttttttttctttcttttccacagatatggattttaccgatcagg(AAT)4	128648	128713
Manglietia crassipes	48	(CATT)3	130816	130827
Manglietia crassipes	49	(A)10	132386	132395
Manglietia crassipes	50	(T)12	135902	135913
Manglietia crassipes	51	(ACTAAT)3	144369	144386
Manglietia dandyi	1	(A)10	211	220
Manglietia dandyi	2	(AAAT)4	4394	4409
Manglietia dandyi	3	(T)12	4582	4593
Manglietia dandyi	4	(A)10	4751	4760
Manglietia dandyi	5	(T)10ggaaggaat(A)11	5375	5404
Manglietia dandyi	6	(C)11	7187	7197
Manglietia dandyi	7	(T)12	7771	7782
Manglietia dandyi	8	(TA)5	9442	9451
Manglietia dandyi	9	(T)11aagttggatcaacccttccaattgaatgagtataagtaaaggatccatggatgaagatacaaaaatgtatttctaatcgtaactagatcttcca(T)11	10261	10376
Manglietia dandyi	10	(A)15	12762	12776
Manglietia dandyi	11	(A)10	13853	13862
Manglietia dandyi	12	(A)11	17508	17518
Manglietia dandyi	13	(T)12	19700	19711
Manglietia dandyi	14	(AT)5	20452	20461
Manglietia dandyi	15	(AT)5	21074	21083
Manglietia dandyi	16	(T)11	31325	31335
Manglietia dandyi	17	(AT)5	33309	33318
Manglietia dandyi	18	(TA)6	34980	34991
Manglietia dandyi	19	(GAA)4	39321	39332
Manglietia dandyi	20	(T)10	45386	45395
Manglietia dandyi	21	(TAAA)3(A)12*	46906	46926
Manglietia dandyi	22	(G)10	47817	47826
Manglietia dandyi	23	(A)11	50224	50234
Manglietia dandyi	24	(T)10	53496	53505
Manglietia dandyi	25	(T)10	55659	55668
Manglietia dandyi	26	(T)10	55875	55884
Manglietia dandyi	27	(ATA)4	57876	57887
Manglietia dandyi	28	(G)14	58370	58383
Manglietia dandyi	29	(TA)5	60209	60218
Manglietia dandyi	30	(A)11	64730	64740
Manglietia dandyi	31	(TC)5	64933	64942
Manglietia dandyi	32	(AATG)3	65543	65554
Manglietia dandyi	33	(T)10	70256	70265
Manglietia dandyi	34	(C)10(T)10	71217	71236
Manglietia dandyi	35	(TTC)4	71524	71535
Manglietia dandyi	36	(TA)6	71829	71840
Manglietia dandyi	37	(ATAA)3	73099	73110
Manglietia dandyi	38	(T)12	74480	74491
Manglietia dandyi	39	(T)12	75465	75476
Manglietia dandyi	40	(T)10	77903	77912
Manglietia dandyi	41	(T)12	84454	84465
Manglietia dandyi	42	(T)11	84953	84963
Manglietia dandyi	43	(ACAT)3	87674	87685
Manglietia dandyi	44	(TATTAG)3	103614	103631
Manglietia dandyi	45	(A)13	112084	112096
Manglietia dandyi	46	(AATT)3	115058	115069
Manglietia dandyi	47	(AAAT)3	117031	117042
Manglietia dandyi	48	(C)10	118542	118551
Manglietia dandyi	49	(T)11	124163	124173
Manglietia dandyi	50	(A)14	126094	126107
Manglietia dandyi	51	(AATC)3	126409	126420
Manglietia dandyi	52	(TC)6ttttttttctttcttttccacagatatggattttaccgatcagg(AAT)4	128785	128852
Manglietia dandyi	53	(CATT)3	130955	130966
Manglietia dandyi	54	(A)10	132525	132534
Manglietia dandyi	55	(T)13	136077	136089
Manglietia dandyi	56	(ACTAAT)3	144541	144558
Manglietia duclouxii	1	(A)10	214	223
Manglietia duclouxii	2	(A)11	1729	1739
Manglietia duclouxii	3	(A)10	3942	3951
Manglietia duclouxii	4	(AAAT)4	4398	4413
Manglietia duclouxii	5	(T)11	4586	4596
Manglietia duclouxii	6	(A)11	5396	5406
Manglietia duclouxii	7	(T)12	7772	7783
Manglietia duclouxii	8	(TA)5	9443	9452
Manglietia duclouxii	9	(T)11	10365	10375
Manglietia duclouxii	10	(A)14	12761	12774
Manglietia duclouxii	11	(A)10	13851	13860
Manglietia duclouxii	12	(A)15	17506	17520
Manglietia duclouxii	13	(T)12	19702	19713
Manglietia duclouxii	14	(AT)5	21076	21085
Manglietia duclouxii	15	(A)10	29186	29195
Manglietia duclouxii	16	(A)10	30553	30562
Manglietia duclouxii	17	(T)13	31340	31352
Manglietia duclouxii	18	(AT)5	33321	33330
Manglietia duclouxii	19	(TA)6	34976	34987
Manglietia duclouxii	20	(A)10	38866	38875
Manglietia duclouxii	21	(GAA)4	39318	39329
Manglietia duclouxii	22	(TAAA)3	46902	46913
Manglietia duclouxii	23	(G)11	47809	47819
Manglietia duclouxii	24	(A)10	49385	49394
Manglietia duclouxii	25	(A)11	50252	50262
Manglietia duclouxii	26	(T)10	55694	55703
Manglietia duclouxii	27	(ATA)4	57910	57921
Manglietia duclouxii	28	(G)10	58405	58414
Manglietia duclouxii	29	(TA)5	60240	60249
Manglietia duclouxii	30	(TC)5	64969	64978
Manglietia duclouxii	31	(AATG)3	65579	65590
Manglietia duclouxii	32	(T)11	70287	70297
Manglietia duclouxii	33	(C)12	71249	71260
Manglietia duclouxii	34	(TTC)4	71556	71567
Manglietia duclouxii	35	(TA)6	71861	71872
Manglietia duclouxii	36	(T)10	72391	72400
Manglietia duclouxii	37	(ATAA)3	73132	73143
Manglietia duclouxii	38	(T)13	75495	75507
Manglietia duclouxii	39	(T)10	77934	77943
Manglietia duclouxii	40	(T)13	84976	84988
Manglietia duclouxii	41	(ACAT)3	87695	87706
Manglietia duclouxii	42	(TATTAG)3	103636	103653
Manglietia duclouxii	43	(A)12	112110	112121
Manglietia duclouxii	44	(AATT)3	115077	115088
Manglietia duclouxii	45	(AAAT)3	117050	117061
Manglietia duclouxii	46	(T)10	122832	122841
Manglietia duclouxii	47	(T)10	124195	124204
Manglietia duclouxii	48	(A)10	126125	126134
Manglietia duclouxii	49	(AATC)3	126436	126447
Manglietia duclouxii	50	(TC)5ttttttttctttcttttccacagatatggattttaccgatcagg(AAT)4	128812	128877
Manglietia duclouxii	51	(CATT)3	130985	130996
Manglietia duclouxii	52	(A)10	132555	132564
Manglietia duclouxii	53	(T)12	136053	136064
Manglietia duclouxii	54	(ACTAAT)3	144520	144537
Manglietia aromatica1	1	(A)10	316	325
Manglietia aromatica1	2	(A)10	4044	4053
Manglietia aromatica1	3	(AAAT)4	4500	4515
Manglietia aromatica1	4	(T)11	4688	4698
Manglietia aromatica1	5	(A)10	4856	4865
Manglietia aromatica1	6	(T)10ggaaggaat(A)12	5480	5510
Manglietia aromatica1	7	(C)11	7293	7303
Manglietia aromatica1	8	(T)12	7877	7888
Manglietia aromatica1	9	(TA)5	9548	9557
Manglietia aromatica1	10	(T)11aagttggatcaacccttccaattgaatgagtataagtaaaggatccatggatgaagatacaaaaatgtatttctaatcgtaactagatcttcca(T)11	10367	10482
Manglietia aromatica1	11	(A)15	12868	12882
Manglietia aromatica1	12	(A)10	13959	13968
Manglietia aromatica1	13	(A)12	17614	17625
Manglietia aromatica1	14	(T)12	19807	19818
Manglietia aromatica1	15	(AT)5	20559	20568
Manglietia aromatica1	16	(AT)5	21181	21190
Manglietia aromatica1	17	(T)11	31432	31442
Manglietia aromatica1	18	(AT)5	33417	33426
Manglietia aromatica1	19	(TA)6	35085	35096
Manglietia aromatica1	20	(GAA)4	39426	39437
Manglietia aromatica1	21	(T)10	45491	45500
Manglietia aromatica1	22	(TAAA)3(A)11*	47011	47030
Manglietia aromatica1	23	(G)10	47921	47930
Manglietia aromatica1	24	(A)10	50334	50343
Manglietia aromatica1	25	(T)10	53611	53620
Manglietia aromatica1	26	(T)10	55774	55783
Manglietia aromatica1	27	(ATA)4	57990	58001
Manglietia aromatica1	28	(G)11	58484	58494
Manglietia aromatica1	29	(TA)5	60320	60329
Manglietia aromatica1	30	(A)10	64841	64850
Manglietia aromatica1	31	(TC)5	65043	65052
Manglietia aromatica1	32	(AATG)3	65653	65664
Manglietia aromatica1	33	(C)10	71327	71336
Manglietia aromatica1	34	(TTC)4	71627	71638
Manglietia aromatica1	35	(TA)6	71932	71943
Manglietia aromatica1	36	(ATAA)3	73202	73213
Manglietia aromatica1	37	(T)10	74583	74592
Manglietia aromatica1	38	(T)13	75566	75578
Manglietia aromatica1	39	(T)11	84555	84565
Manglietia aromatica1	40	(T)11	85053	85063
Manglietia aromatica1	41	(ACAT)3	87774	87785
Manglietia aromatica1	42	(TATTAG)3	103819	103836
Manglietia aromatica1	43	(A)13	112289	112301
Manglietia aromatica1	44	(AATT)3	115368	115379
Manglietia aromatica1	45	(AAAT)3	117341	117352
Manglietia aromatica1	46	(C)15	118857	118871
Manglietia aromatica1	47	(T)10	124482	124491
Manglietia aromatica1	48	(A)13	126412	126424
Manglietia aromatica1	49	(AATC)3	126726	126737
Manglietia aromatica1	50	(TC)7tttttttctttcttttccacagatatggattttaccgatcagg(AAT)4	129102	129170
Manglietia aromatica1	51	(CATT)3	131273	131284
Manglietia aromatica1	52	(A)10	132843	132852
Manglietia aromatica1	53	(T)13	136446	136458
Manglietia aromatica1	54	(ACTAAT)3	144910	144927
Manglietia decidua	1	(A)12	211	222
Manglietia decidua	2	(AAAT)4	4397	4412
Manglietia decidua	3	(T)10	4585	4594
Manglietia decidua	4	(T)10ggaaggaat(A)10	5374	5402
Manglietia decidua	5	(C)13	7178	7190
Manglietia decidua	6	(T)11	7764	7774
Manglietia decidua	7	(TA)5	9434	9443
Manglietia decidua	8	(T)10aagttggatcaacccttccaattgaatgagtataagtaaaggatccatggatgaagatacaaaaatgtatttctaatcgtaactagatcttcca(T)10	10253	10366
Manglietia decidua	9	(A)18	12752	12769
Manglietia decidua	10	(A)12	13846	13857
Manglietia decidua	11	(A)12	17521	17532
Manglietia decidua	12	(T)12	19714	19725
Manglietia decidua	13	(AT)5	21088	21097
Manglietia decidua	14	(A)10	30554	30563
Manglietia decidua	15	(T)13	31341	31353
Manglietia decidua	16	(AT)5	33379	33388
Manglietia decidua	17	(A)12ggaaagagtaataaat(TA)6	35010	35049
Manglietia decidua	18	(T)10	45446	45455
Manglietia decidua	19	(TAAA)3	46966	46977
Manglietia decidua	20	(A)10	50299	50308
Manglietia decidua	21	(T)10	55742	55751
Manglietia decidua	22	(ATA)4	57958	57969
Manglietia decidua	23	(A)10(G)12	58444	58465
Manglietia decidua	24	(TA)5	60295	60304
Manglietia decidua	25	(A)11	64817	64827
Manglietia decidua	26	(AATG)3	65630	65641
Manglietia decidua	27	(T)10	70337	70346
Manglietia decidua	28	(C)11(T)10	71298	71318
Manglietia decidua	29	(TTC)4	71630	71641
Manglietia decidua	30	(TA)6	71941	71952
Manglietia decidua	31	(ATAA)3	73211	73222
Manglietia decidua	32	(T)10	74592	74601
Manglietia decidua	33	(T)12	75575	75586
Manglietia decidua	34	(T)13	85054	85066
Manglietia decidua	35	(ACAT)3	87777	87788
Manglietia decidua	36	(A)12	112182	112193
Manglietia decidua	37	(AATT)3	115162	115173
Manglietia decidua	38	(AAAT)3	117135	117146
Manglietia decidua	39	(A)12	118655	118666
Manglietia decidua	40	(T)10	122920	122929
Manglietia decidua	41	(A)11	126212	126222
Manglietia decidua	42	(AATC)3	126524	126535
Manglietia decidua	43	(TC)6tttttttttctttcttttccacagatatggattttaccgatcagg(AAT)4	128900	128968
Manglietia decidua	44	(CATT)3	131071	131082
Manglietia decidua	45	(A)10	132641	132650
Manglietia decidua	46	(T)12	136157	136168

## Sheet: Table S5
Table S5. Types and numbers of long repeats in the twenty-two Manglietia cp genomes.
Species	Dispersed repeats				Palindromic repeats	Tandem repeats	Total repeats of each species
	Forward	Reverse	Complement	subtotal
Manglietia aromatica2	16	0	0	16	14	19	49
Manglietia conifera	12	0	0	12	16	20	48
Manglietia crassipes	14	0	0	14	15	19	48
Manglietia dandyi	18	0	0	18	16	20	54
Manglietia decidua	15	0	0	15	16	22	53
Manglietia duclouxii	14	0	0	14	15	20	49
Manglietia fordiana	19	0	0	19	16	20	55
Manglietia calcarea3	15	0	0	15	16	19	50
Manglietia glaucifolia	14	0	0	14	14	20	48
Manglietia grandis	15	0	0	15	18	20	53
Manglietia hookeri	13	0	0	13	14	20	47
Manglietia insignis	11	0	0	11	16	22	49
Manglietia lucida	14	0	0	14	15	23	52
Manglietia obovalifolia	14	0	0	14	16	20	50
Manglietia patungensis	18	0	0	18	14	21	53
Manglietia ventii	14	0	0	14	15	20	49
Manglietia zhengyiana	15	0	0	15	13	20	48
Manglietia calcarea2	19	0	0	19	18	22	59
Manglietia calcarea1	18	0	0	18	19	22	59
Manglietia glauca	18	0	0	18	19	24	61
Manglietia kwangtungensis	19	0	0	19	19	23	61
Manglietia aromatia1	17	0	0	17	20	23	60
Total and proportion (%)	342/29.61	0	0	342/29.61	354/30.65	459/39.74	1155/100
